## **Explicit expression of mesophyll conductance in the traditional leaf photosynthesis–transpiration coupled model and its physiological significances**

Hong Luo<sup>1</sup>, Marc Carriqui<sup>2</sup>, Miquel Nadal<sup>2</sup>, Tuo Han<sup>3</sup>, Christiane Werner<sup>4</sup>, Jian-feng Huang<sup>5</sup>, Jiao-lin Zhang<sup>5</sup>, Zhi-guo Yu<sup>6</sup>, Feng-min Li<sup>1</sup>, Xiang-wen Fang<sup>1</sup>, Wei Xue<sup>1\*</sup>

<sup>1</sup>College of Earth and Environmental Sciences, School of Life Sciences, State Key Laboratory of Grassland Agroecosystems, Lanzhou University, Lanzhou730000, China

<sup>2</sup>Research Group in Plant Biology under Mediterranean Conditions, Agro-Environmental and Water Economics Institute, Universitat de les IllesBalears, Palma, IllesBalears 07122, Spain

<sup>3</sup>The Northwest Institute of Eco-Environment and Resources, Chinese Academy of Sciences, Lanzhou730000, China

<sup>4</sup>Department of Ecosystem Physiology, University of Freiburg, Freiburg 79110, Germany

<sup>5</sup>Key Laboratory of Tropical Forest Ecology, Xishuangbanna Tropical Botanical Garden, Chinese Academy of Sciences, Mengla 666303, China

<sup>6</sup>Nanjing University of Information Science and Technology, School of Hydrology and Water Resources, Nanjing 210044, China

\*Author for correspondence: Wei Xue, Tel: 0931-8912560; Email: [xuewei@lzu.edu.cn](mailto:xuewei@lzu.edu.cn)

|                                                               |      |                               |                                 |
|---------------------------------------------------------------|------|-------------------------------|---------------------------------|
| Total word count (excluding summary, references and legends): | 6480 | No. of figures:               | 4 (all of Fig in color)         |
| Summary:                                                      | 180  | No. of Tables:                | 2                               |
| Introduction:                                                 | 841  | No. of Supporting Information | 16 (Figs. S1–S10; Tables S1–S6) |

|                        |      |        |  |
|------------------------|------|--------|--|
|                        |      | files: |  |
| Materials and Methods: | 1936 |        |  |
| Results:               | 1669 |        |  |
| Discussion:            | 2034 |        |  |

1 **Explicit expression of mesophyll conductance in the traditional leaf**  
2 **photosynthesis–transpiration coupled model and its physiological significances**

3

4

5 **Summary**

- 6 ● Almost all terrestrial biosphere models (TBMs) still assume infinite mesophyll  
7 conductance ( $g_m$ ) to estimate photosynthesis and transpiration. This assumption has  
8 caused low accuracy of TBMs to predict leaf gas exchange under certain conditions.
- 9 ● Here, we developed a photosynthesis–transpiration coupled model that explicitly  
10 considers  $g_m$  and designed an optimized parameterization solution through  
11 evaluating four different  $g_m$  estimation methods in 19  $C_3$  species at 31 experimental  
12 treatments.
- 13 ● Temperature responses of the maximum carboxylation rate ( $V_{cmax}$ ) and the electron  
14 transport rate ( $J_{max}$ ) estimated using the Bayesian retrieval algorithm and the  
15 Sharkey online calculator and  $g_m$  temperature response estimated using the  
16 chlorophyll fluorescence–gas exchange method and anatomy method predicted leaf  
17 gas exchange better. The  $g_m$  temperature response exhibited activation energy ( $\Delta H_a$ )  
18 of  $63.13 \pm 36.89 \text{ kJ mol}^{-1}$  and entropy ( $\Delta S$ ) of  $654.49 \pm 11.36 \text{ J K}^{-1} \text{ mol}^{-1}$ . The  $g_m$   
19 optimal temperature ( $T_{opt\_g_m}$ ) explained 58% of variations in photosynthesis  
20 optimal temperature ( $T_{optA}$ ). The  $g_m$  explicit expression has equally important  
21 effects on photosynthesis and transpiration estimations.
- 22 ● Results advanced understandings of better representation of plant photosynthesis  
23 and transpiration in TBMs.

24

25 **Keywords:** mesophyll conductance, photosynthesis, terrestrial biosphere models,  
26 temperature response, transpiration

27

28

29 **Introduction**

30 The leaf photosynthesis–transpiration coupled model is the basis of vegetation  
31 photosynthesis and transpiration estimations performed using terrestrial biosphere  
32 models (TBMs) (Dai *et al.*, 2003; Rogers *et al.*, 2017). The model is based on the  
33 biochemical-based photosynthesis theory developed by Farquhar *et al.* (1980), which  
34 considers the leaf stomatal aperture as the primary gauge of CO<sub>2</sub> influx and water vapor  
35 efflux and assumes an infinite conductance of CO<sub>2</sub> diffusion from sub-stomatal cavities  
36 to the chloroplast stroma (i.e. mesophyll conductance,  $g_m$ ). In such cases, there is no  
37 CO<sub>2</sub> concentration drawdown between the intercellular airspace and the chloroplast  
38 stroma. However, now it is widely accepted not only that there is a significant CO<sub>2</sub>  
39 diffusion drawdown from the intercellular airspace to the chloroplast stroma, but that  
40 the resistance that causes this drawdown can be similar or greater than stomatal  
41 resistance in land plants (Flexas *et al.*, 2012; Evans and von Caemmerer, 2013; von  
42 Caemmerer and Evans, 2015; Gago *et al.*, 2019). Currently, almost all TBMs do not  
43 explicitly consider  $g_m$  (Rogers *et al.*, 2017; Knauer *et al.*, 2019; 2020; Iqbal *et al.*, 2021),  
44 primarily because of (1) huge disputes in response characteristics of  $g_m$  to ambient  
45 environment, particularly the temperature response (von Caemmerer and Evans, 2015;  
46 Bahar *et al.*, 2018; Shrestha *et al.*, 2019; Li *et al.*, 2020; Evans, 2021), and (2) lack of  
47 a  $g_m$  finite photosynthesis–transpiration coupled model that can be applied to as many  
48 C<sub>3</sub> species as possible (Niinemets *et al.*, 2009; Xue *et al.*, 2017; Knauer *et al.*, 2020).

49 Mesophyll conductance cannot be directly measured mainly because it is not  
50 possible to determine the CO<sub>2</sub> concentration within the chloroplast stroma. Thus,  
51 modeling methods are required to estimate  $g_m$ , which could be grouped into four classes  
52 according to the algorithm principle and field measurement tools: the chlorophyll  
53 fluorescence–gas exchange method (i.e.  $g_{m\_F}$ ) (Harley *et al.*, 1992); the anatomy  
54 method (i.e.  $g_{m\_A}$ ) (Tosens *et al.*, 2012; Tomas *et al.*, 2013); the <sup>13</sup>C isotope  
55 discrimination method (Evans *et al.*, 1986; Barbour *et al.*, 2007; Pons *et al.*, 2009;  
56 Evans and von Caemmerer, 2013; Flexas *et al.*, 2013); and the curve-fitting parameter  
57 retrieval methods (Sharkey *et al.*, 2007; von Caemmerer *et al.*, 2009; Gu *et al.*, 2010;  
58 Zhu *et al.*, 2011; von Caemmerer, 2013, Han *et al.*, 2020). These methods have their

59 own advantages and weakness in terms of model parameter assumptions, resulting in  
60 large discrepancies in the estimated temperature response of  $g_m$  (Pons *et al.*, 2009;  
61 Evans, 2021). Therefore, we decided to select the best  $g_m$  estimation method in terms  
62 of accuracy in predicting leaf gas exchange at any temperature, namely a good criterion  
63 to select at each temperature which  $g_m$  estimation method works best is the one that  
64 could predict leaf gas exchange more accurately.

65 Effects of the  $g_m$  finite expression on photosynthesis have been widely  
66 demonstrated, whereas few attentions are paid on transpiration. Considering the indirect  
67 effects of  $g_m$  on transpiration and the direct effect on photosynthesis through its control  
68 on chloroplast  $CO_2$  concentration, Knauer *et al.* (2020) determined that  $g_m$  has a greater  
69 effect on photosynthesis but no significant effects on transpiration in most species and  
70 hence proposed the ‘the asymmetric effects on photosynthesis and transpiration  
71 estimations’ hypothesis. Kumarathunge *et al.* (2019) found that variations in  
72 photosynthesis optimal temperature ( $T_{optA}$ ) can be primarily explained by changes in  
73 the ratio of the apparent maximum electron transport rate and the apparent maximum  
74 carboxylation rate at 25°C ( $J_{a,25}/V_{a,25}$ ,  $JVr$ ), thus proposing ‘the  $JVr$  biochemical  
75 limitations’ hypothesis.  $J_{a,25}$  and  $V_{a,25}$  estimations in their study were derived from the  
76  $A_n/C_i$  curve without explicitly considering  $g_m$ . Previous results indicated significant  
77 changes in  $T_{optA}$  under different intercellular  $CO_2$  concentrations ( $C_i$ ) in  $C_3$  species  
78 (Farquhar *et al.*, 1980; Rogers *et al.*, 2017), suggesting that the  $CO_2$  substrate levels  
79 significantly affect  $T_{optA}$ . The  $CO_2$  substrate levels inside the chloroplasts in turn are  
80 strongly controlled by  $g_m$ . We speculated that the plausibility of the  $T_{optA}-JVr$   
81 relationship reported by Kumarathunge *et al.* (2019) is questionable in reality. The  
82 observed variations in  $T_{optA}$  among plant species may not be solely explained by  
83 biochemical limitations.

84 As a first step towards the better representation of plant photosynthesis and  
85 transpiration in most TBMs, we attempted to develop a  $g_m$  finite model that could be  
86 directly implemented in most TBMs, in addition to design an optimized parameter  
87 configuration solution that is physiologically meaningful and can be applied to as many

88 C<sub>3</sub> species as possible. The optimized parameterization solution was designed by  
89 comparing multiple different parameter estimation methods used for  $g_m$ ,  $V_{cmax}$ , and  $J_{max}$   
90 estimations. The response features of  $g_m$ ,  $V_{cmax}$ , and  $J_{max}$  to temperature were therefore  
91 determined. Validation of the predictability of the  $g_m$  finite model compared to a  
92 traditional photosynthesis model assuming infinite  $g_m$  (abbreviated as the  $g_m$  infinite  
93 model) was performed in 19 C<sub>3</sub> species under 31 experimental conditions. The effects  
94 of the  $g_m$  finite expression on leaf photosynthesis and transpiration estimations were  
95 quantified to evaluate the ‘the *JVr* biochemical limitations’ hypothesis proposed by  
96 Kumarathunge *et al.* (2019) and ‘the asymmetric effects on photosynthesis and  
97 transpiration estimations’ hypothesis proposed by Knauer *et al.* (2020).

98

## 99 **Materials and methods**

### 100 **Model description**

101 In line with the photosynthesis–transpiration coupled model adopted by most  
102 TBMs, the Farquhar, von Caemmerer & Berry (1980) (FvCB) photosynthesis model  
103 and a stomatal conductance sub-model (Ball *et al.*, 1987; Leuning, 1995) were coupled  
104 to quantify leaf carbon uptake and water loss through transpiration.  $A_n$  is limited either  
105 by the Rubisco carboxylation rate at a low CO<sub>2</sub> concentration ( $W_c$ ) or the RuBP  
106 regeneration rate at a relatively high CO<sub>2</sub> concentration because of low electron  
107 transport rates ( $W_j$ ) or deficit inorganic phosphate for photophosphorylation ( $W_p$ ).  $A_n$   
108 can be expressed as follows:

$$109 \quad A_n = \left(1 - \frac{\Gamma^*}{C}\right) \min\{W_c, W_j, W_p\} - R_d \quad (\text{Eqn 1})$$

$$110 \quad W_c = \frac{V_{cmax}C}{C + K_c(1 + O/K_o)} \quad (\text{Eqn 2})$$

$$111 \quad W_j = \frac{JC}{4(C + 2\Gamma^*)} \quad (\text{Eqn 3})$$

$$112 \quad W_p = 3TPU \quad (\text{Eqn 4})$$

113 where  $V_{cmax}$  is the maximum carboxylation rate;  $\Gamma^*$  is the CO<sub>2</sub> compensation point  
114 without mitochondrial respiration;  $K_c$  and  $K_o$  are the Michaelis–Menten constants for  
115 CO<sub>2</sub> and O<sub>2</sub>, respectively;  $R_d$  and  $J$  are dark respiration in the light and the electron

116 transport rate, respectively;  $TPU$  is the rate of triose phosphate export from the  
 117 chloroplasts.  $C$  is  $C_i$  for the  $g_m$  infinite model or  $CO_2$  concentration inside the  
 118 chloroplasts ( $C_c$ ) for the  $g_m$  finite models, which can be determined using Eqns. 9 and  
 119 10.  $J$  is modeled as a function of incident photosynthetically active radiation ( $PAR$ ),  
 120 which is calculated either using the Smith equation (Eqn. 5) (Harley and Tenhunen,  
 121 1991; Xu and Badocchi, 2003; Owen *et al.*, 2007; Xue *et al.*, 2017) or the non-  
 122 rectangle hyperbola equation (Eqn. 6) (Farquhar *et al.*, 1980; Medlyn *et al.*, 2002;  
 123 Sharkey *et al.*, 2007; Rogers *et al.*, 2017; Kumarathunge *et al.*, 2019) as follows:

$$124 \quad J = \frac{\alpha PAR}{\left(1 + \frac{\alpha^2 PAR^2}{J_{max}^2}\right)^{\frac{1}{2}}} \quad (\text{Eqn 5})$$

$$125 \quad \Theta J^2 - (\alpha PAR + J_{max})J + \alpha PAR J_{max} = 0 \quad (\text{Eqn 6})$$

126 where  $\alpha$  is the quantum yield of electron transport;  $\Theta$  is the curvature of the non-  
 127 rectangle hyperbola equation (Table 1); and  $J_{max}$  is the maximum electron transport rate.  
 128 Despite formulas for  $J$  calculation between the Smith and non-  
 129 rectangle hyperbola models are different, similar values in  $J$  were obtained between  
 130 them. The non-rectangle hyperbola model has been broadly applied in most TBMs  
 131 (Rogers *et al.*, 2017; Kumarathunge *et al.*, 2019). Hence, the  $g_m$  infinite and finite  
 132 models that consider the non-rectangle hyperbola model were performed in following  
 133 parts.

134 Under well-watered conditions, the correlation between photosynthetic parameters  
 135 and temperature can be expressed by the peak Arrhenius function (Dreyer, 2001;  
 136 Medlyn *et al.*, 2002; Xue *et al.*, 2017; Kumarathunge *et al.*, 2019; Knauer *et al.*, 2019)  
 137 as follows:

$$138 \quad V_{cmax}/J_{max}/g_m = \frac{k_{25} e^{\Delta H_a(T_k - 298.1)/298.1/R/T_k}}{1 + e^{(\Delta S T_k - \Delta H_d)/R/T_k}} (1 + e^{(298.1 \Delta S - \Delta H_d)/R/298.1}) \quad (\text{Eqn 7})$$

139 where  $k_{25}$  is the photosynthetic parameter value at 25°C ( $V_{cmax,25}$ ,  $J_{max,25}$ , or  $g_{m,25}$ );  $\Delta H_a$   
 140 is the activation energy;  $\Delta H_d$  is the deactivation energy;  $\Delta S$  is the entropy term which  
 141 characterizes the changes in reaction rate caused by substrate concentration (Table 1);  
 142  $T_k$  is leaf temperature in Kelvin unit; and  $R$  is the gas constant ( $8.314 \text{ Pa m}^3 \text{ K}^{-1} \text{ mol}^{-1}$ ).

143  $V_{cmax}$ ,  $J_{max}$ , and  $g_m$  can be estimated from field measurements, whereas  $C$  remains  
 144 unknown in the leaf photosynthesis model. The leaf photosynthesis model is therefore  
 145 required to be coupled with the stomatal conductance sub-model for predicting the  
 146 behavior of stomatal conductance by depending on environmental drivers and  $A_n$ . The  
 147 stomatal conductance sub-model can be expressed as follows:

$$148 \quad g_{sw} = g_{min} + g_{fac} \frac{A_n}{(C_s - \Gamma^*) \times \left(1.0 + \frac{VPD}{a}\right)} \quad (\text{Eqn 8})$$

149 where  $a$  is a constant (default as 35kPa);  $g_{min}$  is the value of  $g_{sw}$  when  $A_n$  is zero;  $g_{fac}$  is  
 150 the stomatal sensitivity to the assimilation rate; and  $VPD$  is the vapor pressure deficit  
 151 between the leaf surface and atmosphere;  $g_{sw}$  is the stomatal conductance to water vapor;  
 152 and  $g_{fac}$  and  $g_{min}$  are the slope and intercept of the linear relationship between  $g_{sw}$  and  
 153  $A_n$ , respectively, which were extracted from the diurnal gas exchange data.

154 To predict the response of  $A_n$  to leaf temperature at ambient and relatively high  
 155 CO<sub>2</sub> concentrations and light saturation levels (i.e.  $A_{max}$ - $T_{leaf}$  curve) for the species  
 156 derived from literature, we needed to determine the  $g_{fac}$  and  $g_{min}$  values, without the  
 157 diurnal gas exchange information. According to our field measurements,  $g_{fac}$  was set to  
 158 3.0 for the woody species and 4.0 for the herbaceous species. The  $g_{min}$  was set to 10.0  
 159 mmol m<sup>-2</sup> s<sup>-1</sup> for both C<sub>3</sub> woody and herbaceous species, as commonly adopted by most  
 160 TBMs (Sellers *et al.*, 1996). An initial value was set for  $C$ , and then,  $A_n$  was determined  
 161 using Eqn. 1. The known  $A_n$  was substituted into Eqn. 8 for  $g_{sw}$  estimation, which in  
 162 turn was substituted into Eqn. 9 or 10 to generate a new  $C$  value. The new  $C$  value was  
 163 then compared with the previous value. This new  $C$  value was adjusted and then  
 164 considered as the second initial value for Eqn. 1 until the difference between the  
 165 generated  $C$  and the previous one became less than 0.05 ppm. The iteration procedure  
 166 used here (i.e. the Newton–Raphson iteration method) was consistent with that used by  
 167 most TBMs (Dai *et al.*, 2003; Sellers *et al.*, 1996).

168 **Table 1** Input parameters of the  $g_m$  finite photosynthesis-transpiration coupled model. Fixed values  
 169 were referred to Harley and Tenhunen (1991), Xue *et al.* (2017), Knauer *et al.* (2019) and  
 170 Kumarathunge *et al.* (2019). The Rubisco kinetic parameters ( $K_c$ ,  $K_o$ , and  $\Gamma^*$ ) were modeled by the  
 171 Arrhenius function, i.e.  $[\exp(c-\Delta H_a/R/T_k)]$ .

| Input parameters | Value | Unit                                 | Parameter estimation and expression |
|------------------|-------|--------------------------------------|-------------------------------------|
| $V_{cmax,25}$    |       | μmol m <sup>-2</sup> s <sup>-1</sup> | $A_n/C_i$ curves, Eqn. 7            |



|                         |        |                                       |                                                                          |
|-------------------------|--------|---------------------------------------|--------------------------------------------------------------------------|
| $\Delta H_a (V_{cmax})$ |        | $J \text{ mol}^{-1}$                  |                                                                          |
| $\Delta S (V_{cmax})$   |        | $J \text{ K}^{-1} \text{ mol}^{-1}$   |                                                                          |
| $\Delta H_d (V_{cmax})$ | 200000 | $J \text{ mol}^{-1}$                  | Fixed value                                                              |
| $J_{max,25}$            |        | $\mu\text{mol m}^{-2} \text{ s}^{-1}$ | $A_n/C_i$ curves, Eqn. 7                                                 |
| $\Delta H_a (J_{max})$  |        | $J \text{ mol}^{-1}$                  |                                                                          |
| $\Delta S (J_{max})$    |        | $J \text{ K}^{-1} \text{ mol}^{-1}$   |                                                                          |
| $\Delta H_d (J_{max})$  | 200000 | $J \text{ mol}^{-1}$                  | Fixed value                                                              |
| $g_{m,25}$              |        | $\text{mmol m}^{-2} \text{ s}^{-1}$   | $A_n/C_i$ curves and chlorophyll fluorescence, anatomical traits, Eqn. 7 |
| $\Delta H_a (g_m)$      |        | $J \text{ mol}^{-1}$                  |                                                                          |
| $\Delta S (g_m)$        |        | $J \text{ K}^{-1} \text{ mol}^{-1}$   |                                                                          |
| $\Delta H_d (g_m)$      | 200000 | $J \text{ mol}^{-1}$                  | Fixed value                                                              |
| $g_{fac}$               |        | unitless                              | Diurnal gas exchange, Eqn. 8                                             |
| $g_{min}$               |        | $\text{mmol m}^{-2} \text{ s}^{-1}$   |                                                                          |
| $g_{max}$               | 900    | $\text{mmol m}^{-2} \text{ s}^{-1}$   | Fixed value                                                              |
| $O_2$                   | 210    | $\text{mmol mol}^{-1}$                | Fixed value                                                              |
| $\alpha$                | 0.24   | unitless                              | Fixed value                                                              |
| $\Theta$                | 0.85   | unitless                              | Fixed value                                                              |
| $R_{d,25}$              |        | $\mu\text{mol m}^{-2} \text{ s}^{-1}$ | Gas exchange measurement                                                 |
| $\Delta H_a (R_d)$      |        | $J \text{ mol}^{-1}$                  | Xue <i>et al.</i> (2017)                                                 |
| $\Delta H_a (K_o)$      | 23720  | $J \text{ mol}^{-1}$                  |                                                                          |
| $c (K_o)$               | 14.68  | $\text{mmol mol}^{-1}$                |                                                                          |
| $\Delta H_a (K_c)$      | 80990  | $J \text{ mol}^{-1}$                  |                                                                          |
| $c (K_c)$               | 38.28  | $\mu\text{mol mol}^{-1}$              | Bernacchi <i>et al.</i> (2002)                                           |
| $\Delta H_a (\Gamma^*)$ | 24460  | $J \text{ mol}^{-1}$                  |                                                                          |
| $c (\Gamma^*)$          | 13.49  | $\mu\text{mol mol}^{-1}$              |                                                                          |

172

### 173 (1) The $g_m$ infinite model and parameterization

174 In the  $g_m$  infinite model, the  $\text{CO}_2$  diffusion conductance from intercellular airspace  
 175 to the chloroplast stroma was assumed to be infinitely large, a common practice in line  
 176 with almost all TBMs. Photosynthesis is considered to be limited either by stomatal  
 177 aperture/closure or by  $\text{CO}_2$  fixation, which depends on the functioning of leaf  
 178 photochemistry and/or photosynthetic enzymes.  $C$  is the intercellular  $\text{CO}_2$  concentration.  
 179 According to the Fick's first law,  $C$  can be expressed as:

$$180 \quad C = C_s - 1.56A_n/g_{sw} \quad (\text{Eqn 9})$$

181 where  $C_s$  is leaf surface  $\text{CO}_2$  concentration.

182 The apparent maximum carboxylation rate ( $V_a$ ) was estimated using the linear  
 183 phase of the  $A_n/C_i$  curve ( $C_i$  from 50 to 200 ppm) and the apparent maximum electron  
 184 transport rate ( $J_a$ ) was estimated using the saturated phase ( $C_i > 400$  ppm) by referring  
 185 to the studies by Xu and Badocchi (2003) and Kumarathunge *et al.* (2019). Input  
 186 parameters for the  $g_m$  infinite model were clarified in Methods S1.

187

## 188 (2) The $g_m$ finite model and parameterization

189 In the  $g_m$  finite model, the total conductance of CO<sub>2</sub> diffusion from the leaf surface  
190 to the chloroplast stroma consists of  $g_{sw}$  and  $g_m$ . Photosynthesis is limited by three major  
191 factors: stomatal conductance, mesophyll conductance, and  
192 biochemical/photochemical limitations.  $C$  is the CO<sub>2</sub> concentration inside the  
193 chloroplasts that depends on  $A_n$ ,  $g_{sw}$ ,  $g_m$ , and  $C_s$ . It can be expressed according to the  
194 Fick's first law as follows:

$$195 C = C_s - A_n(1.56/g_{sw} + 1.0/g_m) \quad (\text{Eqn 10})$$

196  $V_{cmax}$  and  $J_{max}$  are the maximum carboxylation rate and the maximum electron  
197 transport rate based on the CO<sub>2</sub> concentration in the chloroplasts, respectively. In this  
198 study,  $V_{cmax}$ ,  $J_{max}$ , and  $g_m$  values were estimated using four different parameter  
199 estimation methods. The Bayesian retrieval algorithm (Zhu *et al.*, 2011; Han *et al.*, 2020)  
200 and the Sharkey online calculator (Sharkey *et al.*, 2007) were used to estimate  $V_{cmax}$ ,  
201  $J_{max}$ , and  $g_m$  values by using the  $A_n/C_i$  curve (abbreviated as  $V_{cmax\_B}$ ,  $J_{max\_B}$ ,  $g_{m\_B}$  and  
202  $V_{cmax\_S}$ ,  $J_{max\_S}$ , and  $g_{m\_S}$ , respectively). The chlorophyll fluorescence–gas exchange  
203 method was used to estimate  $g_m$  by using the variable  $J$  method (abbreviated as  $g_{m\_F}$ ),  
204 according to methods used in studies by Harley *et al.* (1992), Niinemets *et al.* (2009),  
205 Xue *et al.* (2016; 2017), and Carriquí *et al.* (2020; 2021). The anatomy method for  $g_m$   
206 estimation is constrained to a narrow range of leaf temperature around 25°C ( $g_{m\_A,25}$ )  
207 (Tosens *et al.*, 2012; Tomas *et al.*, 2013). In this study, the prior range of parameters for  
208 the Bayesian retrieval algorithm adopted the range recommended by Zhu *et al.* (2011)  
209 and Han *et al.* (2020). The prior ranges of  $R_d$  for woody plants and herb plants were  
210 0.01–2.0  $\mu\text{mol m}^{-2} \text{s}^{-1}$  and 0.01–5.0  $\mu\text{mol m}^{-2} \text{s}^{-1}$ , respectively. Notably, the unit of  $g_m$   
211 estimated using the Sharkey online calculator and the Bayesian retrieval algorithm was  
212  $\mu\text{mol m}^{-2} \text{s}^{-1} \text{Pa}^{-1}$ ; therefore, it was required to be converted into  $\text{mol m}^{-2} \text{s}^{-1}$  by using  
213 the formula: [ $g_m(\text{mol m}^{-2} \text{s}^{-1}) = g_m(\mu\text{mol m}^{-2} \text{s}^{-1} \text{Pa}^{-1}) \times P/10$ ], where  $P$  is  
214 the actual atmospheric pressure (Pa). Dynamic changes in apparent  $g_m$  in response to  
215 light environments were not of main concern in the current version of the  $g_m$  finite  
216 model.

217  $V_{\text{cmax}}$ ,  $J_{\text{max}}$ , and  $g_{\text{m}}$  estimated using the Sharkey online calculator, Bayesian  
 218 retrieval algorithm, chlorophyll fluorescence–gas exchange method, and anatomy  
 219 method were grouped to develop eight parameterization solutions to drive the  $g_{\text{m}}$  finite  
 220 and infinite models (Table 2). The explicit clarity on the parameter values assumed for  
 221 each parameter estimation method was referred to the Methods S1. For the plant species  
 222 without  $g_{\text{m}_A,25}$  data, model parameterization solutions adopted  $g_{\text{m}_B}$ ,  $g_{\text{m}_S}$ , and  $g_{\text{m}_F}$ .  
 223  $g_{\text{m}_FA}$  at a leaf temperature of 25°C was the mean of  $g_{\text{m}_F,25}$  and  $g_{\text{m}_A,25}$ .  $g_{\text{m}_FA}$  values at  
 224 other temperatures were approximated by  $g_{\text{m}_F}$  only.

225 **Table 2** Eight parameterization solutions considered to drive the  $g_{\text{m}}$  infinite and finite  
 226 photosynthesis–transpiration coupled models.  $V_a$ : the apparent maximum carboxylation rate;  $J_a$ : the  
 227 apparent maximum electron transport rate;  $V_{\text{cmax}_B}$ :  $V_{\text{cmax}}$  estimated using the Bayesian retrieval  
 228 algorithm;  $V_{\text{cmax}_S}$ :  $V_{\text{cmax}}$  estimated using the Sharkey online calculator;  $V_{\text{cmax}_{SB}}$ : the mean of  $V_{\text{cmax}_B}$   
 229 and  $V_{\text{cmax}_S}$ ;  $J_{\text{max}_B}$ :  $J_{\text{max}}$  estimated using the Bayesian retrieval algorithm;  $J_{\text{max}_S}$ :  $J_{\text{max}}$  estimated  
 230 using the Sharkey online calculator;  $J_{\text{max}_{SB}}$ : the mean of  $J_{\text{max}_B}$  and  $J_{\text{max}_S}$ ;  $g_{\text{m}_B}$ :  $g_{\text{m}}$  estimated using  
 231 the Bayesian retrieval algorithm;  $g_{\text{m}_S}$ :  $g_{\text{m}}$  estimated using the Sharkey online calculator;  $g_{\text{m}_F}$ :  $g_{\text{m}}$   
 232 estimated using the chlorophyll fluorescence–gas exchange method;  $g_{\text{m}_A,25}$ :  $g_{\text{m}}$  estimated using the  
 233 anatomy method;  $g_{\text{m}_{SBFA}}$ : the mean of  $g_{\text{m}_S}$ ,  $g_{\text{m}_B}$ ,  $g_{\text{m}_F}$  and  $g_{\text{m}_A,25}$ ; and  $g_{\text{m}_{FA}}$ : the mean of  $g_{\text{m}_F}$  and  
 234  $g_{\text{m}_A,25}$ .

| Solution No. | Solution abbreviation | Configuration of each parameterization solution                  | Model type                        |
|--------------|-----------------------|------------------------------------------------------------------|-----------------------------------|
| 1            | S_S                   | $V_{\text{cmax}_S} + J_{\text{max}_S} + g_{\text{m}_S}$          | The $g_{\text{m}}$ finite model   |
| 2            | S_SBFA                | $V_{\text{cmax}_S} + J_{\text{max}_S} + g_{\text{m}_{SBFA}}$     |                                   |
| 3            | S_FA                  | $V_{\text{cmax}_S} + J_{\text{max}_S} + g_{\text{m}_{FA}}$       |                                   |
| 4            | B_B                   | $V_{\text{cmax}_B} + J_{\text{max}_B} + g_{\text{m}_B}$          | The $g_{\text{m}}$ infinite model |
| 5            | B_SBFA                | $V_{\text{cmax}_B} + J_{\text{max}_B} + g_{\text{m}_{SBFA}}$     |                                   |
| 6            | B_FA                  | $V_{\text{cmax}_B} + J_{\text{max}_B} + g_{\text{m}_{FA}}$       |                                   |
| 7            | SB_FA                 | $V_{\text{cmax}_{SB}} + J_{\text{max}_{SB}} + g_{\text{m}_{FA}}$ |                                   |
| 8            | Inf                   | $V_a + J_a$                                                      |                                   |

235

## 236 Data collection for model validation

237  $V_{\text{cmax}}$ ,  $J_{\text{max}}$ , and  $g_{\text{m}}$  estimations by the four parameter estimation methods were  
 238 performed using field measurements of the  $A_n/C_i$  curve plus chlorophyll fluorescence  
 239 at leaf temperatures ranging from 10-15°C to 40°C in 19 species under 31 experimental  
 240 treatments (four tropical deciduous tree species, four deciduous broadleaf tree species,  
 241 seven evergreen broadleaf tree species, three  $C_3$  crops species, and one  $C_3$  herb and  
 242 grass species) (Methods S2 and S3). Diurnal gas exchange rates were measured in 15  
 243 species under 25 treatments (Methods S2 and S3). Leaves were sampled *in-situ*

244 immediately after the gas exchange measurement to determine the leaf anatomical  
245 structure (Methods S4). For parameter correlation analysis, the  $A_n/C_i$  curve and  
246 chlorophyll fluorescence data at a leaf temperature of 25°C in seven gymnosperms  
247 specie, five ferns species and four herbs species were collected from literature (Carriquí  
248 *et al.*, 2020; Nadal *et al.*, 2018) (Methods S5). For the  $T_{optA}-T_{opt\_gm}$  correlation analysis,  
249 data on  $T_{optA}$  and optimum temperature of  $g_m$  ( $T_{opt\_gm}$ ) estimated using the carbon  
250 isotope discrimination method ( $g_m-^{13}C$ ) and the chlorophyll fluorescence–gas exchange  
251 method in five  $C_3$  crops species, two  $C_3$  herbs and grasses species, and one deciduous  
252 broadleaf tree species were collected from literature (Evans and von Caemmerer, 2013;  
253 Li *et al.*, 2020; Scafaro *et al.*, 2011; von Caemmerer and Evans, 2015; Warren and  
254 Dreyer, 2006; Xue *et al.*, 2016) (Methods S6). Abbreviations of sampled species under  
255 different experimental treatments were referred to Methods S2–S6.

256

### 257 **Evaluations of the $g_m$ infinite and finite models**

258 Independent field data, including the  $A_{max}-T_{leaf}$  curve,  $T_{optA}$ , and diurnal gas  
259 exchange, were used to validate the  $g_m$  infinite and finite models. We fitted the  $A_{max}-$   
260  $T_{leaf}$  curve in Eqn. 11 to obtain  $T_{optA}$  (Sall and Pettersson, 1994; Battaglia *et al.*, 1996;  
261 Gunderson *et al.*, 2009; Kumarathunge *et al.*, 2019),

$$262 \quad A_{max} = A_{opt} - b(T_{leaf} - T_{optA}) \quad (\text{Eqn 11})$$

263 where  $A_{opt}$  is the  $A_n$  at  $T_{optA}$ , and parameter  $b$  (unitless) describes the curvature of  $A_{max}$   
264 and  $T_{leaf}$ .

265 Root mean square error (RMSE) and Nash-Sutcliffe efficiency (NSE) coefficients  
266 were used to quantify the performance of the model (Methods S7).

267 Variation in the Rubisco kinetic parameters measured *in vitro* was less than 10%  
268 amongst  $C_3$  plant species (von Caemmerer, 2020); thus these parameters can be  
269 assumed to be identical for all vegetation types. In this study, the use of the Rubisco  
270 kinetic parameters ( $K_c$ ,  $K_o$ , and  $\Gamma^*$ ) for the  $g_m$  finite model was consistent with  
271 Bernacchi *et al.* (2002). However, Knauer *et al.* (2019; 2020) used two types of Rubisco  
272 kinetic parameters for model comparisons, of which one type was adopted from the

273 study by Bernacchi *et al.* (2002) for the  $g_m$  finite model and the other type was adopted  
274 from a study by Bernacchi *et al.* (2001) for the  $g_m$  infinite model. Similarly, the Rubisco  
275 kinetic parameters in study of Bernacchi *et al.* (2001) were used for parameterization  
276 of the  $g_m$  infinite model in 141  $C_3$  species by the study of Kumarathunge *et al.* (2019).  
277 The hypotheses proposed by Knauer *et al.* (2019; 2020) and Kumarathunge *et al.* (2019)  
278 were evaluated by results in our study. Hence, it is necessary here to parameterize the  
279  $g_m$  infinite model by using the 2001 version in association with the Rubisco kinetic  
280 parameters.

281

## 282 **Results**

### 283 **Temperature responses of $V_{cmax}$ , $J_{max}$ , and $g_m$**

284 The temperature curve-fitting lines for  $V_{cmax\_B}$ ,  $V_{cmax\_S}$ ,  $V_{cmax\_SB}$ , and  $V_a$  increased  
285 rapidly with increase in  $T_{leaf}$  from 10°C to 35°C, and began to decrease after reaching a  
286 peak (about 300  $\mu\text{mol m}^{-2} \text{s}^{-1}$  for  $V_{cmax\_B}$ ,  $V_{cmax\_S}$ , and  $V_{cmax\_SB}$ ; 180  $\mu\text{mol m}^{-2} \text{s}^{-1}$  for  
287  $V_a$ ) at a leaf temperature around 35°C.  $V_{cmax\_B}$ ,  $V_{cmax\_S}$ , and  $V_{cmax\_SB}$  presented a similar  
288 behavior ( $p > 0.1$ , Fig. 1a and Figs. S1a-ae), except at high leaf temperatures  $\geq 35^\circ\text{C}$ .  
289 Despite  $V_{cmax\_SB}$  was significantly higher by 43.9% in average than  $V_a$  at 25°C,  
290 considerable scatter in the difference for the two variables was observed (Table S1).  
291 There were similar values at each leaf temperature among temperature response curves  
292 of  $J_{max\_B}$ ,  $J_{max\_S}$ ,  $J_{max\_SB}$ , and  $J_a$  (Fig. 1b), with the difference among them being less  
293 than 6% at 25°C and the optimal temperatures changing around 32–34°C (Figs. S2a-ae  
294 and Table S2). The  $g_{m\_B}$  temperature curve-fitting line was overlapped with that of  $g_{m\_S}$   
295 (Fig. 1c), whereas both had significantly higher values by 69% and 58% than that of  
296  $g_{m\_FA}$  at 25°C, respectively (Table S3). However, the  $g_{m\_S}$  temperature curve-fitting line  
297 did not well overlap with the 95% confidence interval because of irregular observations  
298 in  $g_{m\_S}$  temperature response among sampled species/treatments (Figs. S3a-ae). The  
299 temperature curve-fitting lines for  $g_{m\_B}$ ,  $g_{m\_S}$ , and  $g_{m\_FA}$  exhibited larger variations in  
300  $T_{opt\_g_m}$ , ranging from 27 to 32°C, which were lower by 15.7% and 10.6% in average as  
301 compared to optimal temperatures for  $V_{cmax}$  (i.e.  $V_{cmax\_B}$ ,  $V_{cmax\_S}$ , and  $V_{cmax\_SB}$ ) and  $J_{max}$

302 (i.e.  $J_{\max\_B}$ ,  $J_{\max\_S}$ ,  $J_{\max\_SB}$ ), respectively.

303 The boxplot minimum value of  $\Delta H_a$  was 49.2 KJ mol<sup>-1</sup> for  $V_{\max\_B}$ , 52.3 KJ mol<sup>-1</sup>  
304 for  $V_{\max\_S}$ , 37.6 KJ mol<sup>-1</sup> for  $V_{\max\_SB}$ , and 65.6 KJ mol<sup>-1</sup> for  $V_a$  (Fig. 1d). For  $J_{\max\_B}$ ,  
305  $J_{\max\_S}$ ,  $J_{\max\_SB}$ , and  $J_a$ , their minimum values were 22.2, 20.8, 22.6, and 23.6 KJ mol<sup>-1</sup>,  
306 respectively (Fig. 1e). Similarities in the minimum value that was close to zero were  
307 observed for  $g_{m\_B}$ ,  $g_{m\_S}$ , and  $g_{m\_FA}$  (Fig. 1f). Zero value in  $\Delta H_a$  was found in Pop\_WC  
308 for  $g_{m\_B}$ , in Pop\_CW for  $g_{m\_S}$ , and in E\_sal and E\_mdel for  $g_{m\_FA}$  (Table S3 and Figs.  
309 S3u, t, q, and r). The proportion of species that exhibited a clear temperature response  
310 was 95% for  $g_{m\_B}$ , 95% for  $g_{m\_S}$ , and 90% for  $g_{m\_FA}$ . There were similarities in the  
311 interquartile range (IQR) of  $\Delta H_a$  among  $V_{\max\_B}$ ,  $V_{\max\_S}$ ,  $V_{\max\_SB}$ , and  $V_a$ , so did the  
312  $\Delta H_a$  of the four  $J_{\max}$  types and the  $\Delta H_a$  of the three  $g_m$  types. However, larger ranges in  
313 the IQR of  $\Delta H_a$  for  $g_m$  (i.e.  $g_{m\_B}$ ,  $g_{m\_S}$ , and  $g_{m\_FA}$ ) than those of  $J_{\max}$  and  $V_{\max}$  were  
314 clearly observed and coefficient of variation ( $CV$ ) in  $\Delta H_a$  of  $g_m$  (i.e.  $g_{m\_B}$ ,  $g_{m\_S}$ , and  
315  $g_{m\_FA}$ ) was amplified in average by 135.2% (Table S3). The IQR of  $\Delta S$  for  $V_{\max\_B}$ ,  
316  $V_{\max\_S}$ ,  $V_{\max\_SB}$ , and  $V_a$  was 5.1, 20.2, 8.3, and 15.6 J K<sup>-1</sup> mol<sup>-1</sup>, respectively (Fig. 1g).  
317 Similarities in the IQR of  $\Delta S$  among  $J_{\max\_B}$ ,  $J_{\max\_S}$ ,  $J_{\max\_SB}$ , and  $J_a$  temperature responses  
318 were evident (Fig. 1h and Table S2). Whereas, the first quartile (Q1) values of  $\Delta S$  for  
319  $g_m$  (i.e.  $g_{m\_B}$ ,  $g_{m\_S}$ , and  $g_{m\_FA}$ ) were similar or slightly higher than the third quartile (Q3)  
320 values of  $V_{\max}$  (i.e.  $V_{\max\_B}$ ,  $V_{\max\_S}$ , and  $V_{\max\_SB}$ ) and  $J_{\max}$  (i.e.  $J_{\max\_B}$ ,  $J_{\max\_S}$ , and  $J_{\max\_SB}$ )  
321 (i.e. mean of the Q1 value for  $g_m$  was 644.5 J K<sup>-1</sup> mol<sup>-1</sup>; mean of the Q3 value for  $V_{\max}$   
322 was 644.1 J K<sup>-1</sup> mol<sup>-1</sup>, and mean of the Q3 value for  $J_{\max}$  was 647.5 J K<sup>-1</sup> mol<sup>-1</sup>). The  
323 mean value of  $\Delta S$  across  $g_{m\_B}$ ,  $g_{m\_S}$ , and  $g_{m\_FA}$  temperature curves was 654 J K<sup>-1</sup> mol<sup>-1</sup>  
324 <sup>1</sup>, whereas it was 639 J K<sup>-1</sup> mol<sup>-1</sup> for  $J_{\max}$  (i.e.  $J_{\max\_B}$ ,  $J_{\max\_S}$ , and  $J_{\max\_SB}$ ) and 637 J K<sup>-1</sup>  
325 mol<sup>-1</sup> for  $V_{\max}$  (i.e.  $V_{\max\_B}$ ,  $V_{\max\_S}$ , and  $V_{\max\_SB}$ ) (Table S1–S3). The  $CV$ 's of  $\Delta S$  for  
326  $g_{m\_B}$ ,  $g_{m\_S}$ , and  $g_{m\_FA}$  temperature curves were 1.74%, 2.88%, and 2.2%, respectively,  
327 while the corresponding  $CV$ 's of  $\Delta H_a$  were 58.45%, 78.98%, and 53.26%, respectively  
328 (Table S3). These results suggested: greater variations in  $\Delta H_a$  and  $\Delta S$  of  $g_m$  than those  
329 of  $V_{\max}$  and  $J_{\max}$ ; large variations in  $\Delta H_a$  and relatively small variations in  $\Delta S$  for  $g_m$ ;  
330 and greater values in  $\Delta S$  for  $g_m$  than those for  $V_{\max}$  and  $J_{\max}$ .

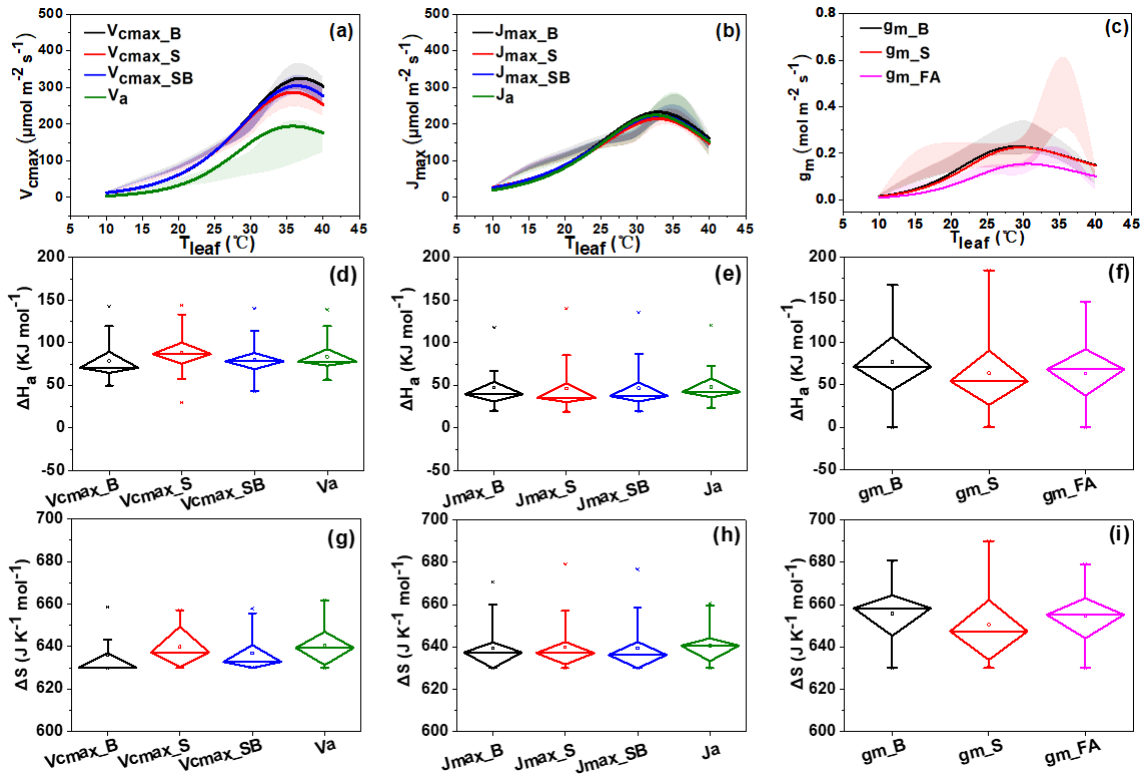

331

332 **Fig. 1**  $V_a$  and  $V_{cmax}$ ,  $J_a$  and  $J_{max}$ , and  $g_m$  temperature response curves performed by fitting the mean  
 333 of parameter estimations of 19 species at 31 treatments using the Eqn. 7 and were labeled by shadow  
 334 zones (Figs. 1a-c). The shadow zone for each curve-fitting line was the 95% confidence interval of  
 335 parameter estimations of all sampled species/treatments. Distribution features of  $\Delta H_a$  and  $\Delta S$  values  
 336 that determine  $V_a$  and  $V_{cmax}$ ,  $J_a$  and  $J_{max}$ , and  $g_m$  temperature response curves in all sampled  
 337 species/treatments were displayed using the box-plot (Figs. 1d-i). The curve-fitting lines of  $V_a$  and  
 338  $V_{cmax}$ ,  $J_a$  and  $J_{max}$ , and  $g_m$  temperature response for individual species/treatment were shown in  
 339 Supporting Information Figs. S1-S3.  $V_{cmax}$ ,  $J_{max}$ , and  $g_m$  values were estimated using different  
 340 parameter estimation methods, namely the Bayesian retrieval algorithm ( $V_{cmax\_B}$ ,  $J_{max\_B}$ , and  $g_{m\_B}$ ,  
 341 black solid line), the Sharkey online electronic calculator ( $V_{cmax\_S}$ ,  $J_{max\_S}$ , and  $g_{m\_S}$ , red solid line),  
 342 the mean of  $V_{cmax\_B}$  and  $V_{cmax\_S}$  and the mean of  $J_{max\_B}$ , and  $J_{max\_S}$  ( $V_{cmax\_SB}$  and  $J_{max\_SB}$ , blue solid  
 343 line), the mean of  $g_m$  estimated using the chlorophyll fluorescence–gas exchange and anatomy  
 344 methods ( $g_{m\_FA}$ , pink solid line), and the apparent maximum carboxylation rate and the apparent  
 345 maximum electron transport rate ( $V_a$  and  $J_a$ , green solid line).

346

### 347 Comparisons between gas exchange observations and simulations by the $g_m$ finite 348 and infinite models

349 For the  $A_{max}-T_{leaf}$  curves measured at ambient  $C_a = 400-450$  ppm, the slopes of the  
 350 linear regression between observations and simulations by the S\_S, S\_SBFA, and S\_FA  
 351 parameterization schemes were 0.87, 0.91, and 1.00, respectively (Figs. 2a-c). The  
 352 adj. $R^2$  values for the three schemes were 0.81, 0.86, and 0.90, respectively, and the  
 353 corresponding NSE values were 0.79, 0.84, and 0.88. The RMSE values of the three  
 354 parameterization schemes accounted for 24%, 22%, and 19% of the mean  $A_{max}$   
 355 ( $A_{max,mean} = 12.47 \mu\text{mol m}^{-2} \text{s}^{-1}$ ). The predicted  $A_{max}$  values from the S\_S and S\_SBFA

356 schemes were 11% and 7% higher than the  $A_{\max, \text{mean}}$ , respectively (Figs. S4a-ae). These  
357 results suggested that  $g_m$  estimation using the chlorophyll fluorescence–gas exchange  
358 method and anatomy method was more reasonable. In line with the results obtained  
359 from S\_S, S\_SBFA, and S\_FA schemes, the B\_FA scheme fitted  $A_{\max}$  at each  
360 temperature better than the B\_B and B\_SBFA schemes (Figs. 2d-f and Figs. S4a-ae),  
361 which further suggested that the configuration of  $g_{m\_FA}$  for  $g_m$  estimation was more  
362 reasonable. As shown in Figs. 1a and b, the values of  $V_{\text{cmax\_B}}$  and  $V_{\text{cmax\_S}}$  and those of  
363  $J_{\text{max\_B}}$  and  $J_{\text{max\_S}}$  at each temperature were similar to each other. Therefore, we  
364 considered the possible effects of the combination of  $V_{\text{cmax}}$  or  $J_{\text{max}}$  estimations using the  
365 Bayesian retrieval algorithm and Sharkey online calculator on  $A_{\max}$  simulations (the  
366 SB\_FA scheme in Figs. S4a-ae). The NSE value for the SB\_FA scheme was 5% and 1%  
367 higher, whereas the ratio of RMSE to  $A_{\max, \text{mean}}$  was 21% and 12% lower than those for  
368 the S\_FA and B\_FA schemes suggesting better  $A_{\max}$  predictions using the parameter  
369 configuration scheme by considering  $V_{\text{cmax\_SB}}$ ,  $J_{\text{max\_SB}}$ , and  $g_{m\_FA}$ . The  $\text{adj.}R^2$ , NSE, and  
370 the ratio of RMSE to  $A_{\max, \text{mean}}$  were 0.85, 0.73, and 28%, respectively (Fig. 2h),  
371 indicating that although the  $g_m$  infinite model is generally credible in estimating the  
372  $A_{\max}$ – $T_{\text{leaf}}$  curve, the prediction errors in this model are relatively larger. We found that  
373  $A_{\max}$  predictions using the  $g_m$  infinite model were significantly higher (16%) than the  
374 observations (partially for 30–40°C, Figs. S4a-ae). Additionally, numerical simulation  
375 indicated that the  $g_m$  finite model driven by the  $g_m$  temperature function without  
376 considering the deactivation stage significantly overestimated  $A_{\max}$  at higher  
377 temperatures 30–35–40°C by 10.99%, 32.51%, 64.06%, respectively. The results  
378 obtained from the eight parameterization schemes at  $C_a = 600$ –630 ppm were similar to  
379 those at  $C_a = 400$ –450 ppm (Figs. 2a-h and Figs. S5a-ae). These results indicated that  
380 the  $g_m$  finite model driven by the SB\_FA scheme could predict  $A_{\max}$  more accurately  
381 than the  $g_m$  infinite model.

382 Figs. 2i-l shows the comparisons in diurnal  $A_n$ ,  $E$ , and  $g_{\text{sw}}$  between observations  
383 and predictions using the  $g_m$  infinite model and the  $g_m$  finite model that is forced by the  
384 parameterization scheme SB\_FA (detailed comparisons in each species/treatment



385 shown in Figs. S6-S8). The adj.R<sup>2</sup> values for  $A_n$ ,  $E$ , and  $g_{sw}$  predicted using the  $g_m$  finite  
386 model were 0.88, 0.85, and 0.78, respectively, whereas those predicted using the  $g_m$   
387 infinite model were 0.87, 0.83, and 0.76, respectively. The NSE values for the three  
388 variables for the  $g_m$  finite model were 0.88, 0.85, and 0.76, respectively, and those for  
389 the  $g_m$  infinite model were 0.76, 0.75, and 0.74, respectively. The ratio of RMSE to the  
390 mean of  $A_n$ ,  $E$ , and  $g_{sw}$  for the  $g_m$  finite model was 27%, 34%, and 40%, respectively,  
391 whereas that for the  $g_m$  infinite model was 38%, 45%, and 42%, respectively.  
392 Meanwhile, significant overestimations in simulated  $A_n$  under heat shocking conditions  
393 (i.e.  $T_{leaf}$  from  $> 30^\circ\text{C}$ ) by 25%–40% by using the  $g_m$  infinite model were observed (Fig.  
394 2l and Fig. S9). These results suggested that the  $g_m$  finite model is superior to the  $g_m$   
395 infinite model in predicting diurnal gas exchange under a wide range of growth  
396 conditions.

397 For the diurnal changes in  $A_n$ , the adj.R<sup>2</sup> and NSE for the  $g_m$  finite model were  
398 improved by 1% and 12% compared with those for the  $g_m$  infinite model. For the diurnal  
399 changes in  $E$ , the adj.R<sup>2</sup> and NSE for the  $g_m$  finite model improved by 2% and 10%  
400 compared with those for the  $g_m$  infinite model. These results suggested that the effects  
401 of  $g_m$  finite expression on photosynthesis and transpiration estimations were almost  
402 equally stronger.

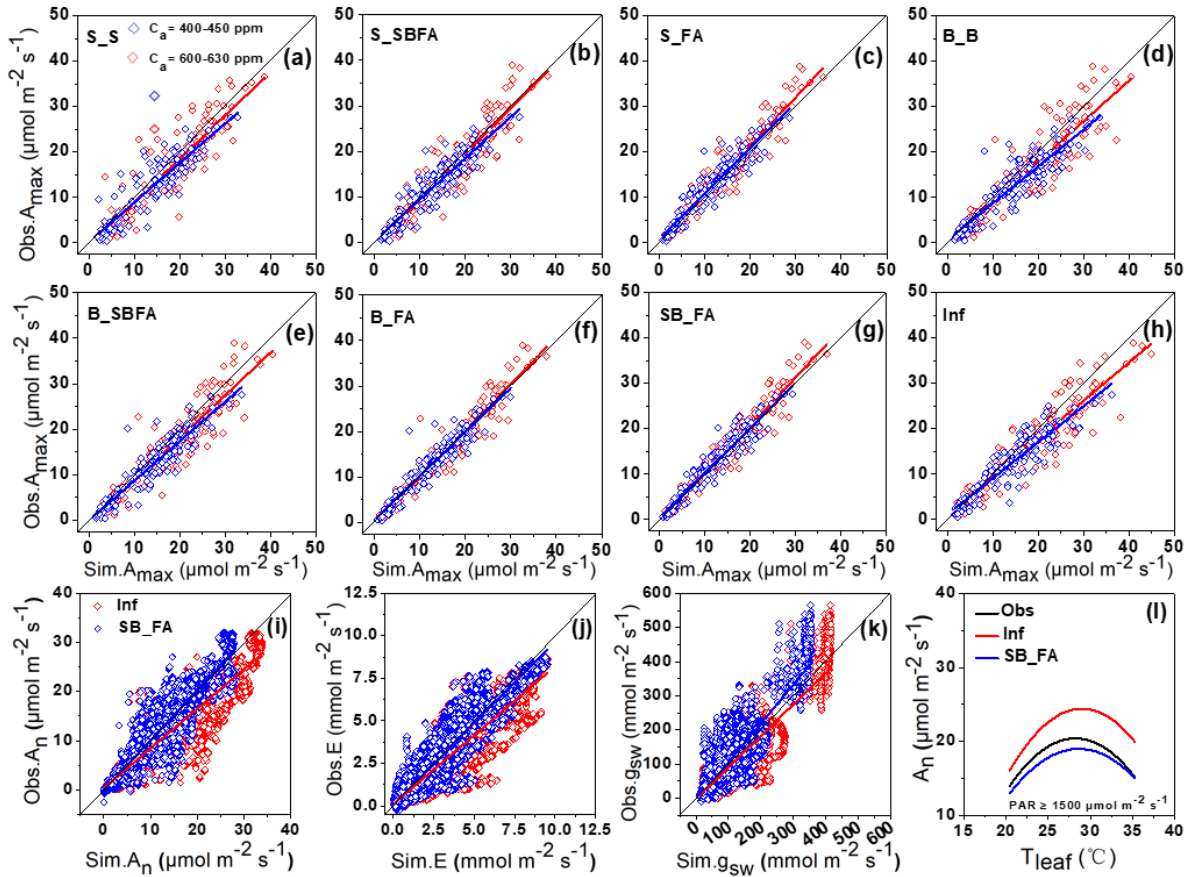

403

404 **Fig. 2** Scatter plots showing comparisons in  $A_{max}$  observations and predictions between the  $g_m$   
 405 infinite and finite models that are forced by eight parameterization schemes (Figs. 2a-h, S\_S,  
 406 S\_SBFA, S\_FA, B\_B, B\_SBFA, B\_FA, SB\_FA, and Inf). The blue solid line signifies the linear  
 407 regression fit between observations at  $C_a = 400\text{-}450$  ppm and predictions, and the red solid line  
 408 signifies the linear regression fit between observations at  $C_a = 600\text{-}630$  ppm and predictions. Scatter  
 409 diagrams in Figs. 2i-k showing comparisons in the diurnal assimilation rate ( $A_n$ ), transpiration rate  
 410 ( $E$ ), and stomatal conductance ( $g_{sw}$ ) between observations and predictions using the  $g_m$  infinite  
 411 model (red diamonds) and the  $g_m$  finite model that is forced by the parameterization scheme SB\_FA  
 412 (blue diamonds). The black solid line represents the 1:1 line. Curve-fitting lines in Fig. 2l show  
 413 comparisons in diurnal  $A_n$  at  $PAR$  greater than  $1500 \mu\text{mol m}^{-2} \text{s}^{-1}$  and across a wide range of leaf  
 414 temperatures between observations (black line) and predictions using the  $g_m$  infinite model (red line)  
 415 and the  $g_m$  finite model that is forced by the parameterization scheme SB\_FA (blue line).  $C_a$ : CO<sub>2</sub>  
 416 concentration at leaf surface;  $PAR$ : photosynthetically active radiation.

417

## 418 Statistical correlations between $T_{optA}$ and photosynthetic parameters

419 The linear regression slope and adj.R<sup>2</sup> values between  $T_{optA}$  predictions using the  
 420  $g_m$  finite model and observations were 0.67 and 0.85, respectively, whereas those  
 421 obtained using the  $g_m$  infinite model were 0.88 and 0.18, respectively (Fig. 3a).  $T_{optA}$   
 422 predicted using the  $g_m$  finite model displayed a better correlation with the observations.  
 423 We observed that  $T_{optA}$  observations had a significant positive correlation with the  $T_{optA}$   
 424  $g_m$  values of  $g_{m\_FA}$  and  $g_{m\_13C}$  temperature responses, and the adj.R<sup>2</sup> value reached 0.58

425 (Fig. 3b). No significant correlations were found among  $T_{\text{optA}}-\Delta H_a$  of  $g_{\text{m\_FA}}$ ,  $T_{\text{optA}}-$   
 426  $g_{\text{m\_FA},25}$ , and  $T_{\text{optA}}-J_{\text{max\_SB},25}/V_{\text{cmax\_SB},25}$  (Fig. S10).

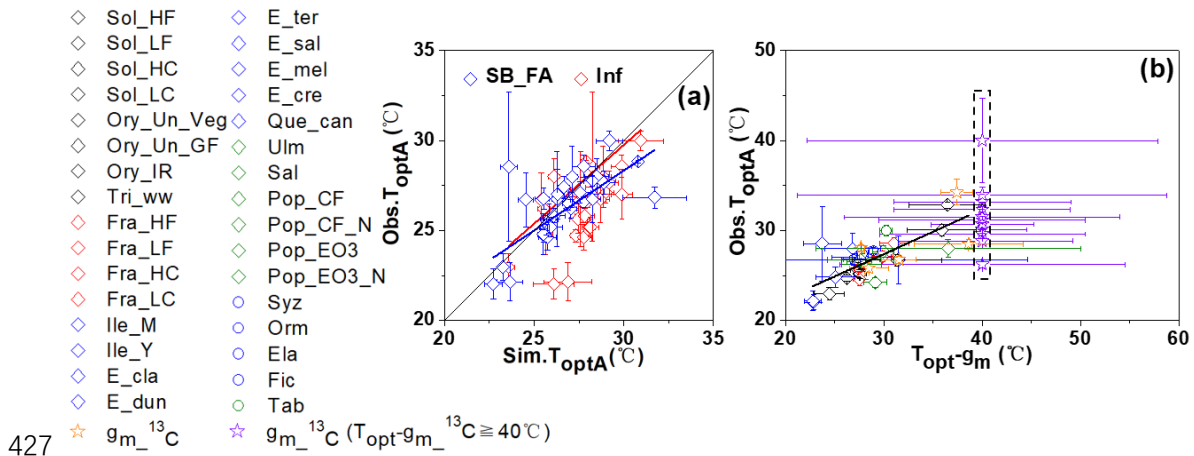

428 **Fig. 3** Scatter diagrams showing comparisons in photosynthesis optimal temperature ( $T_{\text{optA}}$ ) between  
 429 observations (Obs. $T_{\text{optA}}$ ) and predictions using the  $g_{\text{m}}$  finite model forced by the parameterization  
 430 solution SB\_FA (Sim. $T_{\text{optA}}$ , blue circles) and by the  $g_{\text{m}}$  infinite model (red circles) (a) and the  
 431 statistical correlation for Obs. $T_{\text{optA}}$  and  $g_{\text{m}}$  optimal temperature ( $T_{\text{opt-gm}}$ ) across different plant  
 432 functional types (b). The black solid line in Fig. 3a represents the 1:1 line. The red and blue lines in  
 433 Fig. 3a and the black line in Fig. 3b are the linear regression fit.  $T_{\text{opt-gm}}$  in  $g_{\text{m}}$  temperature response  
 434 estimated using the  $^{13}\text{C}$  discrimination method greater than and equal to  $40^\circ\text{C}$  ( $T_{\text{opt-gm}}^{13\text{C}}$  values  $\geq$   
 435  $40^\circ\text{C}$  were unified to be  $40^\circ\text{C}$  shown by purple stars inside the dashed square) was not included for  
 436 statistical correlation analysis in Fig. 3b. The sampled species/treatments are classified into six plant  
 437 functional types (PFTs): black diamonds for  $\text{C}_3$  crops ( $\text{C}_3\text{C}$ ), blue diamonds for evergreen broadleaf  
 438 trees (EBF), green diamonds for deciduous broadleaf trees (DBF), red diamonds for  $\text{C}_3$  herbs and  
 439 grasses ( $\text{C}_3\text{G}$ ), blue circles for tropical evergreen broadleaf trees (TRF), and green circles for tropical  
 440 deciduous broadleaf trees (TDF).

### 442 Statistical correlations among photosynthetic parameters

443  $g_{\text{m\_F},25}$  was positively correlated with  $g_{\text{m\_A},25}$ , whereas the adjusted  $R^2$  (adj. $R^2$ ) was  
 444 0.22, and the linear regression slope was 0.57, which is much lower than 1.0 (Fig. 4a),  
 445 primarily because of large discrepancies between the two variables in rice plants. The  
 446 two variables strongly correlated in other sampled species/treatments with the adj. $R^2$  of  
 447 0.76 and the slope of 0.80. A significant exponential correlation was found between  
 448  $g_{\text{m\_FA},25}$  and  $g_{\text{m\_SB},25}$  (adj. $R^2 = 0.5$ ,  $p < 0.01$ , Fig. 4b), with a close agreement found at  
 449 low  $g_{\text{m}} < 0.15 \text{ mol m}^{-2} \text{ s}^{-1}$ . A negative correlation between  $g_{\text{m\_FA},25}$  and the difference  
 450 for  $V_{\text{cmax\_SB},25}$  vs.  $V_{\text{a},25}$  was found (adj. $R^2 = 0.47$ ,  $p < 0.05$ , Fig. 4c).  $J_{\text{max\_SB},25}$  was closely  
 451 related to  $V_{\text{cmax\_SB},25}$  (adj. $R^2 = 0.83$ ,  $p < 0.05$ , Fig. 4d).

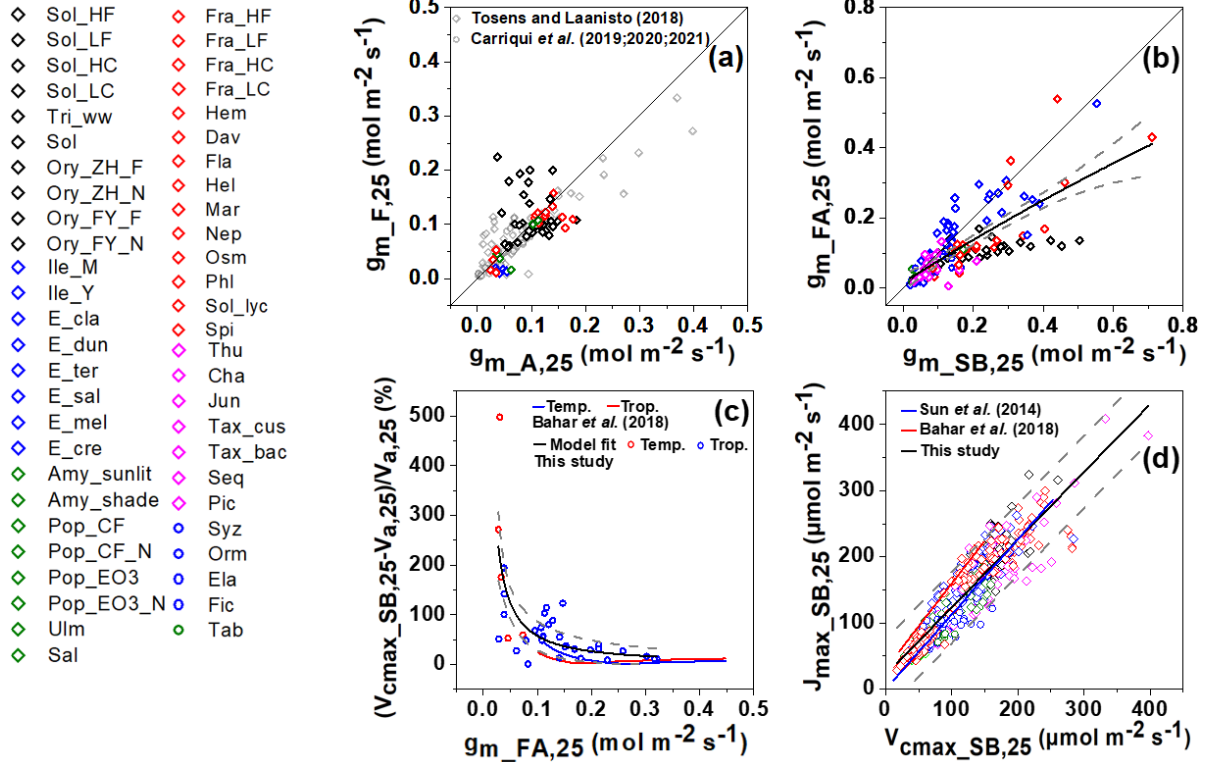

452

453 **Fig. 4** Statistical correlations for  $g_{m,F,25}$ – $g_{m,A,25}$  (a), for  $g_{m,FA,25}$ – $g_{m,SB,25}$  (b), for  $g_{m,FA,25}$ –the  
 454 difference between  $V_{cmax,SB,25}$  and  $V_{a,25}$ , and for  $J_{max,SB,25}$ – $V_{cmax,SB,25}$  in sampled species/treatments.  
 455 The sampled species/treatments in Figs. 4a, b and c are classified into six plant functional types  
 456 (PFTs): black diamonds for  $C_3$  crops ( $C_3C$ ), blue diamonds for evergreen broadleaf trees (EBF),  
 457 green diamonds for deciduous broadleaf trees (DBF), red diamonds for  $C_3$  herbs and grasses ( $C_3G$ ),  
 458 blue circles for tropical evergreen broadleaf trees (TRF), and green circles for tropical deciduous  
 459 broadleaf trees (TDF).  $g_{m,SB,25}$  greater than  $1.5 \text{ mol m}^{-2} \text{ s}^{-1}$  are regarded as outliers and are not  
 460 shown. Gly\_amb, Pop\_WC, and Pop\_CW are not shown as they do not have the observation data  
 461 at a leaf temperature of  $25^\circ\text{C}$ . The paired datasets for  $g_{m,F,25}$  and  $g_{m,A,25}$  in studies of Tosens and  
 462 Laanisto (2018) and Carriqui *et al.* (2019; 2020; 2021) were added in Fig. 4a (grey diamonds and  
 463 circles).  $V_{cmax,Cc}$  and  $V_{cmax,Ci}$  values in temperate species (temp.: *Phyllocladus aspleniifolius*) and  
 464 tropical species (trop.: *Litsea leefeana*) in the study of Bahar *et al.* (2018) were used to calculate the  
 465 difference of the two variables as shown in Fig. 4c (blue and red lines, respectively).  $V_{cmax,Cc}$  in their  
 466 study (i.e.  $V_{cmax,25}$ ) was derived from the  $A_n/C_c$  curve that is converted from the  $A_n/C_i$  curve by  
 467 assuming a constant  $g_m$  at the entire  $C_i$  range.  $V_{cmax,Ci}$  is the apparent  $V_{cmax}$  (i.e.  $V_{a,25}$ ) derived from  
 468 the  $A_n/C_i$  curve in their study, which is equivalent to  $V_a$  in our study. The  $g_{m,25}$  in their study was  
 469 estimated using the  $^{13}\text{C}$  isotope discrimination method. The dashed lines in grey color represent the  
 470 95% prediction intervals of the nonlinear regression.

471

## 472 Discussion

### 473 Superiority of the $g_m$ finite model and an optimized parameterization solution

474 The  $A_{max}$ – $T_{leaf}$  curves were accurately predicted using the  $g_m$  infinite model only  
 475 in 15 species/treatments (Figs. S4d, j-s, y, aa, ad, and ae), whereas  $A_{max}$  values at higher  
 476 temperatures ( $30$ – $40^\circ\text{C}$ ) were largely overestimated in other sampled  
 477 species/treatments. Poor modeling accuracies were also evident in the simulation of

478 diurnal gas exchange rates (Fig. 2l and Figs. S6c, e, h, k, l, n, p, and q). It aligned with  
479 the previous reports in rice and winter wheat by Xue *et al.* (2016) and in *Quercus ilex*  
480 by Niinemets *et al.* (2009) who found that the photosynthesis model that does not  
481 explicitly consider  $g_m$  cannot always predict leaf gas exchange accurately. The  $g_m$  finite  
482 model considers the dependent effects of chloroplast  $CO_2$  concentration on the  
483 assimilation rate, stomatal and mesophyll resistance, and leaf surface  $CO_2$   
484 concentration (von Caemmerer, 2013; 2020). The relationships among  $CO_2$  diffusion  
485 flux,  $CO_2$  concentration gradient between the leaf surface and chloroplasts, and gas  
486 diffusion resistance may be approximated using the Fick's first law (Harley *et al.*, 1992;  
487 Xue *et al.*, 2017), as shown in Eqn. 10. Simulation results in gas exchange in 19 species  
488 under a wide range of growth conditions proved that the  $g_m$  finite model has good  
489 transferability and high prediction capacity, due to which the model can be applied to  
490 as many  $C_3$  species as possible. The  $g_m$  finite model developed in this study can be  
491 conveniently substituted into most TBMs by simply replacing ( $C_i = C_s - 1.56A_n/g_{sw}$ ) as  
492 given in Eqn. 10.

493  $V_{cmax}$ ,  $J_{max}$ , and  $g_m$  temperature responses are key photosynthetic parameters of the  
494  $g_m$  finite model. Despite a "one-point" method has been proposed to quantify  $V_{cmax}$ ,  
495 there is no consensus that this method can be widely used (Burnett *et al.* 2019). One  
496 way to determine  $V_{cmax}$  is from the  $A_n/C_c$  curve that is converted from the  $A_n/C_i$  curve  
497 using a value for  $g_m$  determined at ambient  $CO_2$  and assuming a constant  $g_m$  for the  
498 entire range of  $C_i$  (Manter and Kerrigan, 2004; Bahar *et al.*, 2018). Whereas, the  
499 conversion of  $A_n/C_i$  to  $A_n/C_c$  may not be true at low  $g_m$  values under certain conditions  
500 (Flexas *et al.*, 2007). The key photosynthetic parameters can also be quantified using  
501 the curve-fitting method applied to the  $A_n/C_i$  curve; for example, the Bayesian retrieval  
502 algorithm and the Sharkey online calculator (Sharkey *et al.*, 2007; von Caemmerer  
503 *et al.*, 2009; Gu *et al.*, 2010; Zhu *et al.*, 2011; von Caemmerer, 2013). Because there exists  
504 a curvilinear negative correlation between  $V_{cmax}$  estimation and  $g_m$ , especially at the  
505 lower range of  $g_m$  (generally  $< 0.1 \text{ mol m}^{-2} \text{ s}^{-1}$ ) (von Caemmerer, 2013; Bahar *et al.*,  
506 2018), the Bayesian retrieval algorithm and/or the Sharkey online calculator may have

507 the equifinality phenomenon for different parameters. For the parameterization of the  
508  $g_m$  finite model,  $V_{cmax}$ ,  $J_{max}$ , and  $g_m$  values were estimated by the Bayesian retrieval  
509 algorithm and the Sharkey online calculator. Additionally,  $g_m$  was determined using the  
510 chlorophyll fluorescence–gas exchange method and the anatomy method. Our results  
511 indicated that the  $g_{m\_B}$  temperature responses were significantly different from those of  
512  $g_{m\_S}$  (Figs. S3a-b, d, f-i, l, o-t, y, aa-ac), whereas similarities in the temperature response  
513 curve for either  $V_{cmax}$  or  $J_{max}$  were found between the two curve-fitting methods. It  
514 implied that the observed differences in  $V_{cmax}$  only at high temperatures between the  
515 two methods (Fig. 1a) were likely not related to  $g_m$  estimation. A close agreement  
516 between the  $g_{m\_F,25}$  and  $g_{m\_A,25}$  (Fig. 4a) and the  $T_{opt\_g_m}$  between the chlorophyll  
517 fluorescence–gas exchange method and the Bayesian retrieval method (adj. $R^2 = 0.58$   
518 and the linear slope = 0.81) was evident, respectively. Furthermore, a close agreement  
519 was observed for  $g_{m\_FA,25}$  and  $g_{m\_SB,25}$ , especially at the range of  $< 0.15 \text{ mol m}^{-2} \text{ s}^{-1}$  (Fig.  
520 4b). Results suggested the four parameter estimation methods give similar  $g_m$   
521 estimations, especially at the lower range. The estimations in  $V_{cmax}$  by the Bayesian  
522 retrieval algorithm and the Sharkey online calculator are therefore reasonable,  
523 according to the consequence of variations in  $g_m$  on estimation of  $V_{cmax}$  on  $C_c$  and  $C_i$   
524 bases (Bahar *et al.*, 2018 and Fig. 4c in this study). Finally, we found a significantly  
525 linear correlation between  $V_{cmax\_SB,25}$  and  $J_{max\_SB,25}$  (Fig. 4d), which was similar to the  
526 reports by Bahar *et al.* (2018) and Sun *et al.* (2014). Results suggested that the four  
527 parameter estimation methods are independent of each other in terms of optimization  
528 algorithms and/or principles. In other words, the optimized parameterization scheme  
529 (i.e. the SB\_FA scheme, discussed below) excludes the equifinality phenomenon.

530 In the present study, a close relationship between  $g_{m\_F,25}$  and  $g_{m\_A,25}$  was observed  
531 in most sampled species/treatments (Fig. 4a). The close correspondence between the  
532 two variables has been also reported in many other  $C_3$  species (Tosens and Laanisto,  
533 2018; Carriquí *et al.*, 2019; 2020; 2021) (grey symbols shown in Fig. 4a). Mesophyll  
534 conductance is a complex three-dimensional trait that is probably determined by both  
535 biochemical and anatomical features. The chlorophyll fluorescence method compares

536 gas exchange signal with the optical signal which may vary with the depth through the  
537 mesophyll tissue (Evans, 2021). These variations may explain minor discrepancies  
538 between  $g_{m\_A,25}$  and  $g_{m\_F,25}$  in most sampled species/treatments (Fig. 4a). Carriqui *et al.*  
539 (2020) reported that the cell wall composition is a key factor in the  $g_m$  setting in  
540 sclerophyll species. The constant values in model parameters of the anatomy  $g_m$   
541 estimation method for vascular plants such as the ratio of cell wall porosity to tortuosity  
542 ( $P_{cw}$ ) may also contribute to the discrepancies. In this study,  $g_{m\_F,25}$  was found to be  
543 significantly higher than  $g_{m\_A,25}$  in rice. An extremely dense distribution of mesophyll  
544 cells in rice was observed (ultrastructure images not shown). The total length of the  
545 chloroplast facing the intercellular space ( $l_c$ ) in association with  $g_{m\_A,25}$  by using the  
546 ultrathin sections was probably underestimated in rice because of the exclusion of  
547 tightly adjacent parts of two mesophyll cells in the sampling fields of view.

548 As shown in Figs. 2a and d,  $g_m$  estimation using the  $A_n/C_i$  curve only through the  
549 Bayesian retrieval algorithm or the Sharkey online calculator can accurately predict leaf  
550 gas exchange rates in some species/treatments, whereas cannot in others. A better  
551 modeling performance was obtained by the S\_FA scheme (i.e.  $V_{cmax\_S}+J_{max\_S}+g_{m\_FA}$ )  
552 than the S\_S scheme (i.e.  $V_{cmax\_S}+J_{max\_S}+g_{m\_S}$ ). Our results are similar to reports by  
553 Sharkey *et al.* (2007): if chlorophyll fluorescence data are available, it could be possible  
554 to estimate  $g_m$  from those data to ameliorate reliability of modeling performance. Our  
555 results suggested the SB\_FA solution (i.e.  $V_{cmax\_SB}+J_{max\_SB}+g_{m\_FA}$ ) that can predict the  
556 photosynthesis and transpiration better than other parameterization solutions as the  
557 optimized parameterization solution for the  $g_m$  finite model.

558

### 559 **Temperature responses characteristics of $g_m$**

560 A  $g_m$  response to temperature has been reported in some species, but not in others  
561 (Scafaro *et al.*, 2011; von Caemmerer and Evans, 2015; Shrestha *et al.*, 2019; Evans,  
562 2021; Li *et al.*, 2020), partially due to differences in  $g_m$  estimation methods used by  
563 them, as seen in great variations in  $g_m$  temperature response obtained by different  
564 estimation methods (Fig. 1c and Figs. S3a-ae). We argued that the  $g_m$  estimated using

565 the parameter estimation method that can accurately fit the  $A_{\max}-T_{\text{leaf}}$  curve and diurnal  
566 gas exchange rates has higher credibility than those that cannot predict accurately.  
567 Results of our study suggested that 90% of the sampled species under well-watered  
568 conditions exhibit a significant response of  $g_m$  to temperature. Inter-species variations  
569 in both  $\Delta H_a$  and  $\Delta S$  for  $g_m$  were significantly greater than those of  $V_{\text{cmax}}$  and  $J_{\text{max}}$ . Large  
570 variations in  $\Delta H_a$  signify significant changes in  $g_m$  temperature response across species,  
571 which is in agreement with the results of the studies by Shrestha *et al.* (2019), von  
572 Caemmerer and Evans (2015), and Evans (2021). The two-components modeling  
573 method developed by von Caemmerer and Evans (2015) produced  $\Delta H_a$  for  $\text{CO}_2$   
574 permeability through the membranes, ranging between 36 and 76  $\text{kJ mol}^{-1}$ . Using the  
575 isolated pea leaf plasma membranes, Zhao *et al.* (2017) reported  $\Delta H_a$  for  $\text{CO}_2$   
576 permeability of 30.2 and 52.4  $\text{kJ mol}^{-1}$  at high and low internal carbonic anhydrase (CA)  
577 concentrations. Results of our study reported the lower and upper limits of the 95%  
578 confidence interval of  $\Delta H_a$  for  $g_{m\_FA}$  were 50.14 and 76.12  $\text{kJ mol}^{-1}$ , respectively. The  
579 determined  $\Delta H_a$  values of our study are similar to the ranges reported by von  
580 Caemmerer and Evans (2015) and Zhao *et al.* (2017). The rates of  $\text{CO}_2$  diffusion in the  
581 membranes and during the liquid phase reflect the amount of  $\text{CO}_2$ -permeable and  
582 transport enzyme proteins, their thermal stabilities, and the structural components of  
583 cell wall. Aquaporins in the membranes and CA inside the vesicles that affect  $\Delta H_a$  for  
584  $\text{CO}_2$  permeability/diffusion (Zhao *et al.*, 2017) likely vary greatly in expression levels  
585 and the associating heterotetramers among  $C_3$  species (Otto *et al.*, 2010; Momayyezi *et*  
586 *al.*, 2020). Hence, the determined large variations in temperature response attributes of  
587  $g_m$  are reasonable.

588 The temperatures at which  $V_{\text{cmax}}$  and  $J_{\text{max}}$  deactivate were usually higher than 35°C  
589 and even 40°C in most sampled species. They are similar to the findings in tobacco  
590 (Bernacchiet *al.*, 2001), rice (Xue *et al.*, 2016), and poplar (Silim *et al.*, 2010; Xu *et al.*,  
591 2020). We found that  $g_m$  deactivation temperatures were lower than those for  $V_{\text{cmax}}$  and  
592  $J_{\text{max}}$  (Figs. 1a-c), which are similar to reports by Xu *et al.* (2020) and Warren and Dreyer  
593 (2006). Meanwhile, better accuracy in leaf gas exchange predictions was obtained using



594 the temperature peak function for  $g_m$  than the monotone increasing function. Results  
595 highlighted importance of incorporating the deactivation stage of  $g_m$  into leaf  
596 photosynthesis model for better modeling accuracy. A rapid change in fluidity of plasma  
597 membrane was observed within 3 min after heat shock of 37°C in *A. thaliana* (Zheng  
598 *et al.*, 2012). Changes in fluidity and permeability of plasma membrane at elevated  
599 temperatures (Niu and Xiang, 2018) may cause decline of  $g_m$  at supraoptimal  
600 temperatures.

601

### 602 **Effects of the $g_m$ finite expression on photosynthesis and transpiration**

603 Kumarathunge *et al.* (2019) proposed that the variation in  $T_{optA}$  among species can  
604 be explained by biochemical restrictions ( $J_{a,25}/V_{a,25}$ ).  $V_a$  and  $J_a$  are referred to as the  
605 apparent maximum carboxylation rate and electron transport rate, respectively, and both  
606 these parameters, particularly  $V_a$ , are numerically and physiologically different from  
607  $V_{cmax}$  and  $J_{max}$ . A similar result of an asymmetric effect of  $g_m$  estimation on  $V_{cmax}$  and  
608  $J_{max}$  estimations was reported by Manter and Kerrigan (2004) and Sun *et al.* (2014).  
609 Hence, we may argue that  $V_a$  not only represents the Rubisco carboxylation rate but  
610 also embeds the  $g_m$  effects. Stripping off the  $g_m$  effects from  $V_{a,25}$  would cause changes  
611 in  $J_{a,25}/V_{a,25}$  and then cause significant changes in the  $T_{optA}-J_{a,25}/V_{a,25}$  correlation. Our  
612 results suggested that  $T_{optA}$  has a significant linear correlation with  $T_{opt\_g_m}$  but not  $JVr$ ,  
613  $\Delta H_a$  of  $g_{m\_FA}$ , and  $g_{m\_FA,25}$ , implying that  $T_{optA}$  is probably related to  $g_m$  temperature  
614 response characteristics.

615 A significant nonlinear correlation between  $A_{max,25}$  and  $g_{m,25}$  was observed in 271  
616 species ( $R^2 = 0.73$ ) (Flexas *et al.*, 2021).  $g_m$  limits photosynthesis to an extent similar  
617 to that exerted by stomatal and biochemical limitations in vascular plants (Flexas *et al.*,  
618 2013). Therefore, a strong correlation between  $T_{optA}$  and  $T_{opt\_g_m}$  should be expected.  
619 Whereas, the plasticity in  $T_{optA}$  was not fully related to  $g_m$  because only 58% of the  
620 variations in  $T_{optA}$  were explained by  $g_m$ . Changes in the Rubisco kinetic properties,  
621 such as thermal stability of Rubisco activase (Salvucci and Crafts-Brandner, 2004),  
622 could be an important mechanism.

623 Knauer *et al.* (2020) argued that the  $g_m$  finite expression has significant effects on  
624 photosynthesis estimation and that the effects of  $g_m$  on transpiration are marginal.  
625 Conversely, we found that the effects of the  $g_m$  finite expression on photosynthesis and  
626 transpiration simulations are equally stronger. Significant effects on transpiration  
627 estimation were probably achieved through better predictions of  $g_{sw}$  because  
628 transpiration is a product of  $VPD$  and  $g_{sw}$ . Across diverse species,  $g_m$  is strongly linked  
629 with  $g_{sw}$  and leaf hydraulic conductance through the  $g_m$  linkage to extra-xylem  
630 components (Flexas *et al.*, 2013) such as the plasma membrane intrinsic proteins (PIPs)  
631 subfamily of aquaporins (Groszmann *et al.*, 2017). Physiological mechanisms  
632 underlying the integrated hydraulic–photosynthetic system explained the observed  
633 effects of the  $g_m$  finite expression on photosynthesis and transpiration.

634

## 635 **Conclusions**

636 In this study, we developed a  $g_m$  finite photosynthesis-transpiration coupled model  
637 that can be directly applicable for most TBMs and also proposed an optimized  
638 parameterization solution. The  $g_m$  finite model driven by the parameterization theme of  
639  $V_{cmax\_SB}$ ,  $J_{max\_SB}$  and  $g_{m\_FA}$  could well predict  $A_{max}-T_{leaf}$  curves and diurnal gas exchange  
640 rates in all sampled species under various experimental treatments. However, the  $g_m$   
641 infinite model cannot always accurately track variations in photosynthesis and  
642 transpiration. Results suggested large variations in  $\Delta H_a$  and  $\Delta S$  for  $g_m$ .  $T_{optA}$  was related  
643 to thermal attributes of  $g_m$  not  $JVr$ . Meanwhile, the explicit  $g_m$  expression had equally  
644 important effects on photosynthesis and transpiration estimations at plant species level.  
645 Results of our study proved that the  $g_m$  finite expression in most TBMs is important for  
646 better understanding effects of  $g_m$  on photosynthesis and transpiration under climate  
647 change.

648

## 649 **Acknowledgements**

650 This research was supported by the Fundamental Research Funds for the Central  
651 Universities (lzujbky-2020-28) and the National Natural Science Foundation of China

652 (32001129). Sincere thanks are dedicated to prof. John R. Evans at Australian National  
653 University for his suggestions on our manuscript draft. We are also grateful to Dandan  
654 Liu and Xiao Song for their helps on field data collection and analysis. The authors  
655 declare that they have no conflicts of interest.

656

#### 657 **Author contributions**

658 WX: design of the research and funding, data analysis, collection and  
659 interpretation, and manuscript writing and revision. HL: data analysis, collection and  
660 interpretation, and manuscript writing. JE, MC, MN, TH, and CW: data collection and  
661 analysis, manuscript revision. J-F H, J-L Z, Z-G Y and X-W F: data collection and part  
662 work of data analysis.

663

#### 664 **Data availability**

665 The data that support the findings of this study are available from the  
666 corresponding author upon reasonable request. MATLAB script for Bayesian retrieval  
667 algorithm and the  $g_m$  finite photosynthesis-transpiration coupled model compiled by  
668 FORTRAN can be obtained through directly contacting the correspondence author.

669

#### 670 **References**

671 **Bahar NHA, Hayes L, Scafaro AP, Atkin OK, Evans JR. 2018.** Mesophyll  
672 conductance does not contribute to greater photosynthetic rate per unit nitrogen in  
673 temperate compared with tropical evergreen wet-forest tree leaves. *New*  
674 *Phytologist* **218**: 492–505.

675 **Ball JT, Woodrow IE, Berry JA. 1987.** A model predicting stomatal conductance and  
676 its contribution to the control of photosynthesis under different environmental  
677 conditions. In: Biggins J, eds. *Progress in Photosynthesis Research*, 221–224.

678 **Barbour MM, McDowell NG, Tcherkez G, Bickford CP, Hanson DT. 2007.** A new  
679 measurement technique reveals rapid post-illumination changes in the carbon  
680 isotope composition of leaf-respired CO<sub>2</sub>. *Plant, Cell & Environment* **30**: 469–482.

681 **Battaglia M, Beadle C, Loughhead S. 1996.** Photosynthetic temperature responses of

- 682 *Eucalyptus globulus* and *Eucalyptus nitens*. *Tree Physiology* **16**: 81–89.
- 683 **Bernacchi CJ, Pimentel SE, Portis AR, Long SP. 2001.** Improved temperature  
684 response functions for models of Rubisco-limited photosynthesis. *Plant, Cell &*  
685 *Environment* **24**: 253–259.
- 686 **Bernacchi CJ, Portis AR, Nakano H, von Caemmerer S, Long SP. 2002.**  
687 Temperature response of mesophyll conductance. Implications for the  
688 determination of Rubisco enzyme kinetics and for limitations to photosynthesis in  
689 vivo. *Plant Physiology* **130**: 1992–1998.
- 690 **Burnett AC, Davidson KJ, Serbin SP, Rogers A. 2019.** The “one-point method” for  
691 estimating maximum carboxylation capacity of photosynthesis: A cautionary tale.  
692 *Plant, Cell & Environment* **42**: 2472–2481.
- 693 **Carriquí M, Roig-Oliver M, Brodribb TJ, Coopman R, Gill W, Mark K, Niinemets**  
694 **Ü, Perera-Castro AV, Ribas-Carbó M, Sack L, Tosens T, Waite M, Flexas J.**  
695 **2019.** Anatomical constraints to nonstomatal diffusion conductance and  
696 photosynthesis in lycophytes and bryophytes. *New Phytologist* **222**: 1256–1270.
- 697 **Carriquí M, Nadal M, Clemente-Moreno MJ, Gago J, Miedes E, Flexas J. 2020.**  
698 Cell wall composition strongly influences mesophyll conductance in  
699 gymnosperms. *The Plant Journal* **103**: 1372–1385.
- 700 **Carriquí M, Nadal M, Flexas J. 2021.** Acclimation of mesophyll conductance and  
701 anatomy to light during leaf aging in *Arabidopsis thaliana*. *Physiologia*  
702 *Plantarum* **172**: 1894–1907.
- 703 **Dai Y, Zeng X, Dickinson RE, Baker I, Bonan GB, Bosilovich MG, Denning AS,**  
704 **Dirmeyer PA, Houser PR, Niu G, Oleson KW, Schlosser CA, Yang ZL. 2003.**  
705 The common land model. *Bulletin of the American Meteorological Society* **84**:  
706 1013-1023.
- 707 **Dreyer E, Montpied P, Dauder FA, Masson F. 2001.** Temperature response of leaf  
708 photosynthetic capacity in seedlings from seven temperate tree species. *Tree*  
709 *Physiology* **21**: 223–232.
- 710 **Evans J, Sharkey TD, Berry JA, Farquhar GD. 1986.** Carbon isotope discrimination

- 711 measured concurrently with gas exchange to investigate CO<sub>2</sub> diffusion in leaves  
712 of higher plants. *Australian Journal of Plant Physiology* **13**: 281–92.
- 713 **Evans JR, von Caemmerer S. 2013.** Temperature response of carbon isotope  
714 discrimination and mesophyll conductance in tobacco. *Plant, Cell & Environment*  
715 **36**: 745–756.
- 716 **Evans JR. 2021.** Mesophyll conductance: walls, membranes and spatial complexity.  
717 *New Phytologist* **229**: 1864–1876.
- 718 **Farquhar GD, von Caemmerer S, Ball JA. 1980.** A biochemical model of  
719 photosynthetic CO<sub>2</sub> assimilation in leaves of C<sub>3</sub> species. *Planta* **149**: 78–90.
- 720 **Flexas J, Diaz-Espejo A, Galmés J, Kaldenhoff R, Medrano H, Ribas-Carbo**  
721 **M. 2007.** Rapid variations of mesophyll conductance in response to changes in  
722 CO<sub>2</sub> concentration around leaves. *Plant, Cell & Environment* **30**: 1284–1298
- 723 **Flexas J, Barbour MM, Brendel O, Cabrera HM, Carriquí M, Díaz-Espejo**  
724 **A, Douthe C, Dreyer E, Ferrio JP, Gago**  
725 **J, Gallé A, Galmés J, Kodama N, Medrano H, Niinemets Ü, Peguero-**  
726 **Pina JJ, Pou A, Ribas-Carbó M, Tomás M, Tosens T, Warren CR. 2012.**  
727 Mesophyll diffusion conductance to CO<sub>2</sub>: an unappreciated central player in  
728 photosynthesis. *Plant Science* **193**: 70–84.
- 729 **Flexas J, Scoffoni C, Gago J, Sack L. 2013.** Leaf mesophyll conductance and leaf  
730 hydraulic conductance: an introduction to their measurement and coordination.  
731 *Journal of Experimental Botany* **64**: 3965–3981.
- 732 **Flexas J, Clemente-Moreno MJ, Bota J, Brodribb TJ, Gago J, Mizokami Y, Nadal**  
733 **M, Perera-Castro AV, Roig-Oliver M, Sugiura D, Xiong D, Carriquí M. 2021.**  
734 Cell wall thickness and composition are involved in photosynthetic limitation.  
735 *Journal of Experimental Botany* **72**: 3971–3986.
- 736 **Gago J, Carriquí M, Nadal M, Clemente-Moreno MJ, Coopman RE, Fernie AR,**  
737 **Flexas J. 2019.** Photosynthesis optimized across land plant phylogeny. *Trends in*  
738 *Plant Science* **24**: 947–958.
- 739 **Groszmann M, Osborn HL, Evans JP. 2017.** Carbon dioxide and water transport

- 740 through plant aquaporins. *Plant, Cell & Environment* **40**: 938–961.
- 741 **Rogers A, Medlyn BE, Dukes JS, Bonan G, von Caemmerer S, Dietze**  
742 **MC, Kattge J, Leakey A, Mercado LM, Niinemets Ü, Prentice IC, Serbin**  
743 **SP, Sitch S, Way DA, Zaehle S. 2017.** A roadmap for improving the  
744 representation of photosynthesis in Earth system models. *New Phytologist* **213**:  
745 22–42.
- 746 **Gu L, Pallardy SG, Tu K, Law BE, Wullschleger SD. 2010.** Reliable estimation of  
747 biochemical parameters from C<sub>3</sub> leaf photosynthesis-intercellular carbon dioxide  
748 response curves. *Plant, Cell & Environment* **33**: 1852–1874.
- 749 **Gunderson CA, O'Hara KH, Campion CM, Walker AV, Edwards NT. 2009.**  
750 Thermal plasticity of photosynthesis: the role of acclimation in forest responses to  
751 a warming climate. *Global Change Biology* **16**: 2272–2286.
- 752 **Han T, Zhu G, Ma J, Wang S, Zhang K, Liu X, Ma T, Shang S, Huang C. 2020.**  
753 Sensitivity analysis and estimation using a hierarchical Bayesian method for the  
754 parameters of the FvCB biochemical photosynthetic model. *Photosynthesis*  
755 *Research* **143**: 45–66.
- 756 **Harley PC, Tenhunen JD. 1991.** Modeling the photosynthetic response of C<sub>3</sub> leaves  
757 to environmental factors. *Modeling crop photosynthesis—from biochemistry to*  
758 *canopy* **19**: 17–39.
- 759 **Harley PC, Loreto F, Di Marco G, Sharkey TD. 1992.** Theoretical considerations  
760 when estimating the mesophyll conductance to CO<sub>2</sub> flux by analysis of the  
761 response of photosynthesis to CO<sub>2</sub>. *Plant Physiology* **98**: 1429–1436.
- 876 **Iqbal WA, Miller IG, Moore RL, Hope IJ, Cowan-Turner D, Kapralov MV. 2021.**  
877 Rubisco substitutions predicted to enhance crop performance through carbon  
878 uptake modeling. *Journal of Experimental Botany*  
879 <https://doi.org/10.1093/jxb/erab278>.
- 880 **Knauer J, Zaehle S, De Kauwe MG, Bahar NHA, Evans JR, Medlyn BE,**  
881 **Reichstein M, Werner C. 2019.** Effects of mesophyll conductance on vegetation  
882 responses to elevated CO<sub>2</sub> concentrations in a land surface model. *Global Change*

- 883 *Biology* **25**: 1820–1838.
- 884 **Knauer J, Zaehle S, De Kauwe MG, Haverd V, Reichstein M, Sun Y. 2020.**  
885 Mesophyll conductance in land surface models: effects on photosynthesis and  
886 transpiration. *The Plant Journal* **101**: 858–873.
- 887 **Kumarathunge DP, Medlyn BE, Drake JE, Tjoelker MG, Aspinwall MJ, Battaglia**  
888 **M, Cano FJ, Carter KR, Cavaleri MA, Cernusak LA, et al. 2019.**Acclimation  
889 and adaptation components of the temperature dependence of plant photosynthesis  
890 at the global scale. *New phytologist* **222**: 768–784.
- 891 **Leuning R. 1995.** A critical appraisal of a combined stomatal-photosynthesis model for  
892  $C_3$  plants. *Plant, Cell & Environment* **18**: 339–355.
- 893 **Li Y, Song X, Li S, Salter WT, Barbour MM. 2020.** The role of leaf water potential  
894 in the temperature response of mesophyll conductance. *New phytologist* **225**:  
895 1193–1205.
- 896 **Medlyn B.E, Ellsworth D, Forstreuter M, Harley PC, Kirschbaum MUF, Le Roux**  
897 **X, Montpied P, Strassmeyer J, Walcroft A, Wang K, Loustau D. 2002.**  
898 Temperature response of parameters of a biochemically based model of  
899 photosynthesis. II. A review of experimental data. *Plant, Cell & Environment* **25**:  
900 1167–1179.
- 901 **Manter DK, Kerrigan J. 2004.**  $A/C_i$  curve analysis across a range of woody plant  
902 species: influence of regression analysis parameters and mesophyll conductance.  
903 *Journal of Experimental Botany* **55**: 2581–2588.
- 904 **Momayyezi M, McKown AD, Bell SCS, Guy RD. 2020.** Emerging roles for carbonic  
905 anhydrase in mesophyll conductance and photosynthesis. *The Plant Journal* **101**:  
906 831-844.
- 907 **Niinemets Ü, Díaz-Espejo A, Flexas J, Galmés J, Warren CR. 2009.** Importance of  
908 mesophyll diffusion conductance in estimation of plant photosynthesis in the field.  
909 *Journal of Experimental Botany* **60**: 2271–2282.
- 910 **Niu Y, Xiang Y. 2018.** An overview of biomembrane functions in plant responses to  
911 high-temperature stress. *Frontiers in Plant Science* **9**, 915.

- 912 **Otto B, Uehlein N, Sdorra S, Fischer M, Ayaz M, Belastegui-Macadam X, ...**  
913 **Kaldenhoff R. 2010.** Aquaporin tetramer composition modifies the function of  
914 tobacco aquaporins. *Journal of Biological Chemistry* **285**: 31253–31260.
- 915 **Owen KE., Tenhunen J, Reichstein M, Wang Q, Falge E, Geyer R, Xiao X, Stoy P,**  
916 **Ammann C, Arain A. 2007.** Linking flux network measurements to continental  
917 scale simulations: ecosystem carbon dioxide exchange capacity under non-water-  
918 stressed conditions. *Global Change Biology* **13**: 734–760.
- 919 **Pons TL, Flexas J, von Caemmerer S, Evans JR, Genty B, Ribas-Carbo M,**  
920 **Brugnoli E. 2009.** Estimating mesophyll conductance to CO<sub>2</sub>: methodology,  
921 potential errors, and recommendations. *Journal of Experimental Botany* **60**: 2217–  
922 2234.
- 923 **Sall T, Pettersson P. 1994.** A model of photosynthetic acclimation as a special case of  
924 reaction norms. *Journal of Theoretical Biology* **166**: 1–8.
- 925 **Salvucci ME, Crafts-Brandner SJ. 2004.** Relationship between the heat tolerance of  
926 photosynthesis and the thermal stability of Rubisco activase in plants from  
927 contrasting thermal environments. *Plant Physiology* **134**: 1460–1470.
- 928 **Sellers PJ, Randall DA, Collatz GJ, Berry JA, Field CB, Dazlich DA, Zhang C,**  
929 **Collelo GD, Bounoua L. 1996.** A revised land surface parameterization (SiB2)  
930 for atmospheric GCMS. Part I: model formulation. *Journal of Climate* **9**: 676–705.
- 931 **Scaforo AP, von Caemmerer S, Evans JR, Atwell BJ. 2011.** Temperature response of  
932 mesophyll conductance in cultivated and wild *Oryza* species with contrasting  
933 mesophyll cell wall thickness. *Plant, Cell & Environment* **34**: 1999–2008.
- 934 **Sharkey TD, Bernacchi CJ, Farquhar GD, Singsaas EL. 2007.** Fitting  
935 photosynthetic carbon dioxide response curves for C<sub>3</sub> leaves. *Plant, Cell &*  
936 *Environment* **30**: 1035–1040.
- 937 **Silim SN, Ryan N, Kubien D. 2010.** Temperature response of photosynthesis and  
938 respiration in *Populus balsamifera* L.: acclimation versus adaption.  
939 *Photosynthesis Research* **104**: 19–30.
- 940 **Shrestha A, Song X, Barbour MM. 2019.** The temperature response of mesophyll



- 941 conductance, and its component conductances, varies between species and  
942 genotypes. *Photosynthesis Research* **141**: 65–82.
- 943 **Sun Y, Gu L, Dickinson RE, Pallardy SG, Baker J, Cao Y, DaMatta FM, Dong X,**  
944 **Ellsworth D, Van Goethem D, Jensen AM, Law BE, Loos R, Martins SC,**  
945 **Norby RJ, Warren J, Weston D, Winter K. 2014.** Asymmetrical effects of  
946 mesophyll conductance on fundamental photosynthetic parameters and their  
947 relationships estimated from leaf gas exchange measurements. *Plant, Cell &*  
948 *Environment* **37**: 978–994.
- 949 **Tomas M, Flexas J, Copolovici L, Galmes J, Hallik L, Medrano H, Ribas-Carbo**  
950 **M, Tosens T, Vislap V, Niinemets Ü. 2013.** Importance of leaf anatomy in  
951 determining mesophyll diffusion conductance to CO<sub>2</sub> across species: quantitative  
952 limitations and scaling up by models. *Journal of Experimental Botany* **64**: 2269–  
953 2281.
- 954 **Tosens T, Niinemets Ü, Vislap V, Eichelmann H, Castro Diez P. 2012.**  
955 Developmental changes in mesophyll diffusion conductance and photosynthetic  
956 capacity under different light and water availabilities in *Populus tremula*: how  
957 structure constrains function. *Plant, Cell & Environment* **35**: 839–856.
- 958 **Tosens T, Laanisto L. 2018.** Mesophyll conductance and accurate photosynthetic  
959 carbon gain calculations. *Journal of Experimental Botany* **69**: 5315–5318.
- 960 **von Caemmerer S, Farquhar G, Berry J. 2009.** Biochemical model of C<sub>3</sub>  
961 photosynthesis. In: Laisk, A., Nedbal, L., Govindjee, eds. *Photosynthesis in silico:*  
962 *Understanding complexity from molecules to ecosystems*. Springer Netherlands,  
963 Dordrecht, pp. 209–230.
- 964 **von Caemmerer S. 2013.** Steady-state models of photosynthesis. *Plant, Cell &*  
965 *Environment* **36**: 1617–1630.
- 966 **von Caemmerer S, Evans JR. 2015.** Temperature responses of mesophyll conductance  
967 differ greatly between species. *Plant, Cell & Environment* **38**: 629–637.
- 968 **von Caemmerer, S., 2020.** Rubisco carboxylase/oxygenase: From the enzyme to the  
969 globe: A gas exchange perspective. *Journal of Plant Physiology* **252**: 153240.

- 970 **Warren CR, Dreyer E. 2006.** Temperature response of photosynthesis and internal  
971 conductance to CO<sub>2</sub>: results from two independent approaches. *Journal of*  
972 *Experimental Botany* **57**: 3057–3067.
- 973 **Xu L, Badocchi D. 2003.** Seasonal trends in photosynthetic parameters and stomatal  
974 conductance of blue oak (*Quercus douglasii*) under prolonged summer. *Tree*  
975 *Physiology* **23**: 865–877.
- 976 **Xu Y, Shang B, Feng Z, Tarvainen L. 2020.** Effect of elevated ozone, nitrogen  
977 availability and mesophyll conductance on the temperature responses of leaf  
978 photosynthetic parameters in poplar. *Tree Physiology* **40**: 484–497.
- 979 **Xue W, Otieno D, Ko J, Werner C, Tenhunen J. 2016.** Conditional variations in  
980 temperature response of photosynthesis, mesophyll and stomatal control of water  
981 use in rice and winter wheat. *Field Crops Research* **199**: 77–88.
- 982 **Xue W, Ko J, Werner C, Tenhunen J. 2017.** A spatially hierarchical integration of  
983 close-range remote sensing, leaf structure and physiology assists in diagnosing  
984 spatiotemporal dimensions of field-scale ecosystem photosynthetic productivity.  
985 *Agricultural and Forest Meteorology* **247**: 503–519.
- 986 **Zhao M., Tan H-T, Scharwies J, Levin K, Evans JR, Tyerman SD. 2017.** Association  
987 between water and carbon dioxide transport in leaf plasma membranes: assessing  
988 the role of aquaporins. *Plant, Cell & Environment* **40**: 789–801.
- 989 **Zheng SZ, Liu YL, Li B, Shang ZL, Zhou RG, Sun DY. 2012.** Phosphoinositide-  
990 specific phospholipase C9 is involved in the thermotolerance  
991 of Arabidopsis. *The Plant Journal* **69**: 689–700.
- 992 **Zhu GF, Li X, Su YH, Lu L, Huang CL. 2011.** Seasonal fluctuations and temperature  
993 dependence in photosynthetic parameters and stomatal conductance at the leaf  
994 scale of *Populus euphratica* Oliv. *Tree physiology* **31**:178–195.

995

## 996 **Supporting Information**

997 Additional supporting information may be found in the online version of this article:

998 **Fig. S1** The temperature response curves of  $V_{\text{cmax}}$ .

999 **Fig. S2** The temperature response curves of  $J_{\text{max}}$ .

- 1000 **Fig. S3** The temperature response curves of  $g_m$ .
- 1001 **Fig. S4** Temperature response curves of the net assimilation rate under ambient CO<sub>2</sub>  
1002 concentration (400–450 ppm) and high radiation derived from field measurements and  
1003 predictions.
- 1004 **Fig. S5** Temperature response curves of the net assimilation rate under ambient CO<sub>2</sub>  
1005 concentration (600–630 ppm) and high radiation derived from field measurements and  
1006 predictions.
- 1007 **Fig. S6** Comparisons in diurnal photosynthesis rate between field observations and  
1008 predictions.
- 1009 **Fig. S7** Comparisons in diurnal transpiration rate between field observations and  
1010 predictions.
- 1011 **Fig. S8** Comparisons in diurnal stomatal conductance between field observations and  
1012 predictions.
- 1013 **Fig. S9** Comparisons in diurnal  $A_n$  at PAR greater than 1500  $\mu\text{mol m}^{-2} \text{s}^{-1}$  and across a  
1014 wide range of leaf temperatures between observations and predictions using the  $g_m$   
1015 infinite model and the  $g_m$  finite model that is forced by the parameterization scheme  
1016 SB\_FA.
- 1017 **Fig. S10** Statistical relationships for photosynthesis optimal temperature and the ratio  
1018 of the maximum carboxylation rate to the maximum electron transport rate ( $JV_r$ ) (a),  
1019  $T_{\text{optA}}-g_{m\_F,25}$  (b), and  $T_{\text{optA}}-\text{activation term of } g_{m\_F} (\Delta H_a)$  (c).
- 1020 **Table S1** Temperature response characteristic parameters of  $V_{c\text{max}}$ .
- 1021 **Table S2** Temperature response characteristic parameters of  $J_{\text{max}}$ .
- 1022 **Table S3** Temperature response characteristic parameters of  $g_m$ .
- 1023 **Methods S1** The explicit clarity on the parameter values assumed for each parameter  
1024 estimation method
- 1025 **Methods S2**
- 1026 **Methods S3**
- 1027 **Methods S4**
- 1028 **Methods S5**
- 1029 **Methods S6**
- 1030 **Methods S7**
